# Supplementary material for: Elevation-dependent intensification of fire danger in the western United States
Source: Springer Nature journal article supplement (doi:10.1038/s41467-023-37311-4), 2023-03-30
Supplement: MOESM1 [file 41467_2023_37311_MOESM1_ESM.pdf]

## Supplementary Information

For

### Elevation-dependent intensification of fire danger in the western United States

Mohammad Reza Alizadeh<sup>1,2</sup>, John T. Abatzoglou<sup>3</sup>, Jan Adamowski<sup>1</sup>, Arash Modaresi Rad<sup>4</sup>, Amir AghaKouchak<sup>5,6</sup>, Francesco S. R. Pausata<sup>7</sup>, Mojtaba Sadegh<sup>4</sup>

<sup>1</sup> Department of Bioresource Engineering, McGill University, Quebec, CANADA.

<sup>2</sup> Department of Civil and Environmental Engineering, Massachusetts Institute of Technology, Cambridge, MA, UNITED STATES.

<sup>3</sup> Management of Complex Systems Department, University of California, Merced, Merced, CA, UNITED STATES.

<sup>4</sup> Department of Civil Engineering, Boise State University, Boise, ID, UNITED STATES

<sup>5</sup> Department of Civil and Environmental Engineering, University of California, Irvine, CA, UNITED STATES.

<sup>6</sup> Department of Earth System Science, University of California, Irvine, CA, UNITED STATES.

<sup>7</sup> Department of Earth and Atmospheric Sciences, University of Quebec in Montreal, Montreal, QC, CANADA

**Table S1. Increase in annual critical fire danger days (ERC $\geq$ 60) from 1979-2020 in each elevation band in each ecoregion.**

|                                  | 0-500 m | 500-1000 m | 1000-1500 m | 1500-2000 m | 2000-2500 m | 2500-3000 m | >3000 m |
|----------------------------------|---------|------------|-------------|-------------|-------------|-------------|---------|
| 4: Cascades                      | 3       | 6          | 14          | 25          | 34          | NAN         | NAN     |
| 5: Sierra Nevada                 | 64      | 64         | 59          | 62          | 71          | 81          | 88      |
| 11: Blue Mountains               | 39      | 34         | 35          | 36          | 33          | NAN         | NAN     |
| 13: Central Basin and Range      | NAN     | NAN        | 39          | 60          | 74          | 87          | 97      |
| 15: Northern Rockies             | 21      | 23         | 24          | 25          | 23          | NAN         | NAN     |
| 16: Idaho Batholith              | NAN     | 35         | 30          | 30          | 29          | 28          | 29      |
| 17: Middle Rockies               | NAN     | 25         | 14          | 19          | 20          | 21          | 22      |
| 19: Wasatch and Unita Mountains  | NAN     | NAN        | NAN         | 45          | 54          | 58          | 47      |
| 20: Colorado Plateaus            | NAN     | NAN        | 58          | 65          | 66          | 63          | NAN     |
| 21: Southern Rockies             | NAN     | NAN        | NAN         | 67          | 66          | 59          | 48      |
| 22: Arizona/New Mexico Plateau   | NAN     | 58         | 71          | 79          | 62          | 70          | NAN     |
| 23: Arizona/New Mexico Mountains | NAN     | 104        | 100         | 93          | 82          | 88          | 78      |
| 41: Canadian Rockies             | NAN     | NAN        | 13          | 12          | 12          | NAN         | NAN     |
| 77: North Cascades               | 2       | 9          | 7           | 6           | 7           | NAN         | NAN     |
| 78: Klamath Mountains            | 24      | 30         | 36          | 44          | 50          | NAN         | NAN     |

**Table S2. Increase in warm-season (May-September) critical fire danger days ( $ERC \geq 60$ ) from 1979-2020 in each elevation band in each ecoregion.**

|                                         | 0-500 m | 500-1000 m | 1000-1500 m | 1500-2000 m | 2000-2500 m | 2500-3000 m | >3000 m |
|-----------------------------------------|---------|------------|-------------|-------------|-------------|-------------|---------|
| <i>4: Cascades</i>                      | 3       | 6          | 12          | 21          | 29          | NAN         | NAN     |
| <i>5: Sierra Nevada</i>                 | 34      | 35         | 29          | 36          | 43          | 48          | 53      |
| <i>11: Blue Mountains</i>               | 39      | 34         | 35          | 36          | 33          | NAN         | NAN     |
| <i>13: Central Basin and Range</i>      | NAN     | NAN        | 25          | 36          | 44          | 53          | 59      |
| <i>15: Northern Rockies</i>             | 21      | 23         | 24          | 25          | 23          | NAN         | NAN     |
| <i>16: Idaho Batholith</i>              | NAN     | 35         | 30          | 30          | 29          | 28          | 29      |
| <i>17: Middle Rockies</i>               | NAN     | 24         | 13          | 19          | 20          | 21          | 21      |
| <i>19: Wasatch and Unita Mountains</i>  | NAN     | NAN        | NAN         | 39          | 43          | 45          | 38      |
| <i>20: Colorado Plateaus</i>            | NAN     | NAN        | 17          | 29          | 39          | 41          | NAN     |
| <i>21: Southern Rockies</i>             | NAN     | NAN        | NAN         | 45          | 43          | 41          | 36      |
| <i>22: Arizona/New Mexico Plateau</i>   | NAN     | 11         | 19          | 29          | 31          | 45          | NAN     |
| <i>23: Arizona/New Mexico Mountains</i> | NAN     | 31         | 30          | 29          | 29          | 31          | 33      |
| <i>41: Canadian Rockies</i>             | NAN     | NAN        | 13          | 12          | 12          | NAN         | NAN     |
| <i>77: North Cascades</i>               | 2       | 9          | 7           | 6           | 7           | NAN         | NAN     |
| <i>78: Klamath Mountains</i>            | 21      | 23         | 25          | 30          | 37          | NAN         | NAN     |

**Table S3. Increase in critical fire danger days (ERC $\geq$ 60) outside May-September from 1979-2020 in each elevation band in each ecoregion.**

|                                  | 0-500 m | 500-1000 m | 1000-1500 m | 1500-2000 m | 2000-2500 m | 2500-3000 m | >3000 m |
|----------------------------------|---------|------------|-------------|-------------|-------------|-------------|---------|
| 4: Cascades                      | 0       | 0          | 2           | 4           | 5           | NAN         | NAN     |
| 5: Sierra Nevada                 | 30      | 29         | 30          | 26          | 28          | 33          | 35      |
| 11: Blue Mountains               | 0       | 0          | 0           | 0           | 0           | NAN         | NAN     |
| 13: Central Basin and Range      | NAN     | NAN        | 14          | 24          | 30          | 34          | 38      |
| 15: Northern Rockies             | 0       | 0          | 0           | 0           | 0           | NAN         | NAN     |
| 16: Idaho Batholith              | NAN     | 0          | 0           | 0           | 0           | 0           | 0       |
| 17: Middle Rockies               | NAN     | 1          | 1           | 0           | 0           | 0           | 1       |
| 19: Wasatch and Unita Mountains  | NAN     | NAN        | NAN         | 6           | 11          | 13          | 9       |
| 20: Colorado Plateaus            | NAN     | NAN        | 41          | 36          | 27          | 22          | NAN     |
| 21: Southern Rockies             | NAN     | NAN        | NAN         | 22          | 23          | 18          | 12      |
| 22: Arizona/New Mexico Plateau   | NAN     | 47         | 52          | 50          | 31          | 25          | NAN     |
| 23: Arizona/New Mexico Mountains | NAN     | 73         | 70          | 64          | 53          | 57          | 46      |
| 41: Canadian Rockies             | NAN     | NAN        | 0           | 0           | 0           | NAN         | NAN     |
| 77: North Cascades               | 0       | 0          | 0           | 0           | 0           | NAN         | NAN     |
| 78: Klamath Mountains            | 3       | 7          | 11          | 14          | 13          | NAN         | NAN     |



**Table S4. Land surface area (km<sup>2</sup>) encapsulated in each elevation band in each ecoregion.**

|                                  | 0-500 m | 500-1000 m | 1000-1500 m | 1500-2000 m | 2000-2500 m | 2500-3000 m | >3000 m |
|----------------------------------|---------|------------|-------------|-------------|-------------|-------------|---------|
| 4: Cascades                      | 7,025   | 17,145     | 19,437      | 13,074      | 1,963       | 143         | 66      |
| 5: Sierra Nevada                 | 320     | 5,867      | 10,536      | 14,094      | 10,632      | 6,842       | 4,812   |
| 11: Blue Mountains               | 543     | 12,534     | 38,748      | 16,857      | 2,054       | 174         | 0       |
| 13: Central Basin and Range      | 0       | 29         | 99,301      | 149,569     | 50,607      | 8,016       | 1,267   |
| 15: Northern Rockies             | 1,078   | 33,126     | 34,921      | 12,331      | 503         | 1           | 0       |
| 16: Idaho Batholith              | 25      | 1,320      | 9,455       | 22,146      | 21,897      | 5,104       | 335     |
| 17: Middle Rockies               | 0       | 469        | 23,709      | 48,052      | 53,384      | 30,459      | 8,387   |
| 19: Wasatch and Unita Mountains  | 0       | 0          | 190         | 7,210       | 18,518      | 14,644      | 5,130   |
| 20: Colorado Plateaus            | 0       | 15         | 24,004      | 72,597      | 35,980      | 3,952       | 26      |
| 21: Southern Rockies             | 0       | 0          | 16          | 6,712       | 48,048      | 54,798      | 36,126  |
| 22: Arizona/New Mexico Plateau   | 0       | 368        | 9,982       | 90,060      | 45,204      | 1,243       | 1       |
| 23: Arizona/New Mexico Mountains | 0       | 1,192      | 16,380      | 39,758      | 44,376      | 8,922       | 278     |
| 41: Canadian Rockies             | 0       | 122        | 4,344       | 9,620       | 4,617       | 175         | 1       |
| 77: North Cascades               | 3,135   | 8,140      | 9,931       | 7,295       | 1,843       | 33          | 2       |
| 78: Klamath Mountains            | 8,961   | 20,517     | 13,460      | 4,759       | 652         | 8           | 0       |

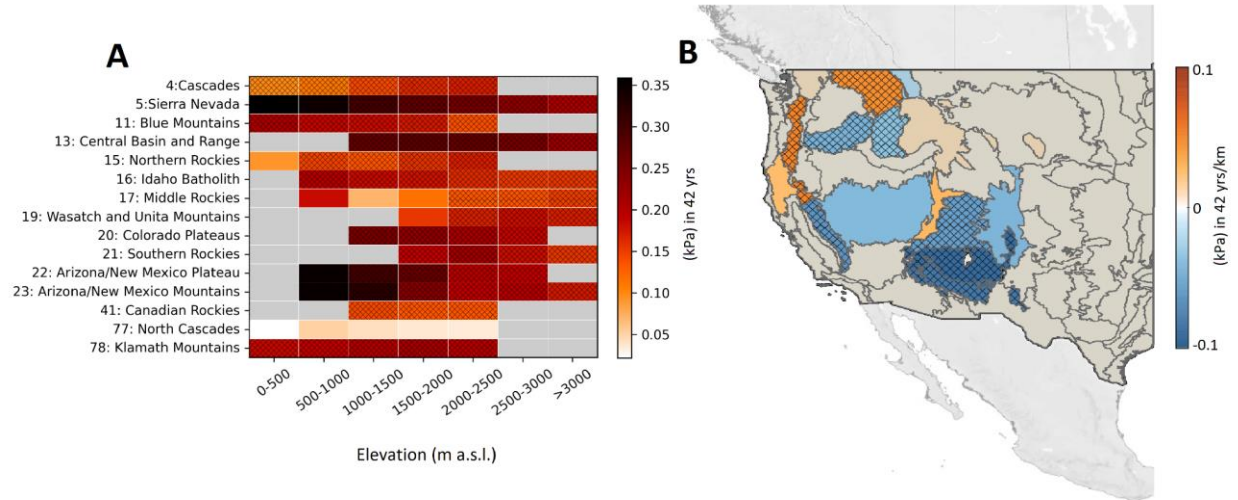

**Figure S1. Elevation-dependent intensification of vapor pressure deficit, VPD. (A)** Temporal trends in warm-season average VPD from 1979-2020 in each elevation band in each mountainous ecoregion of the western US. **(B)** Slope of temporal VPD trends across elevation bands. (© OpenStreetMap contributors 2017. Distributed under the Open Data Commons Open Database License (ODbL) v1.0.)<sup>35</sup>.

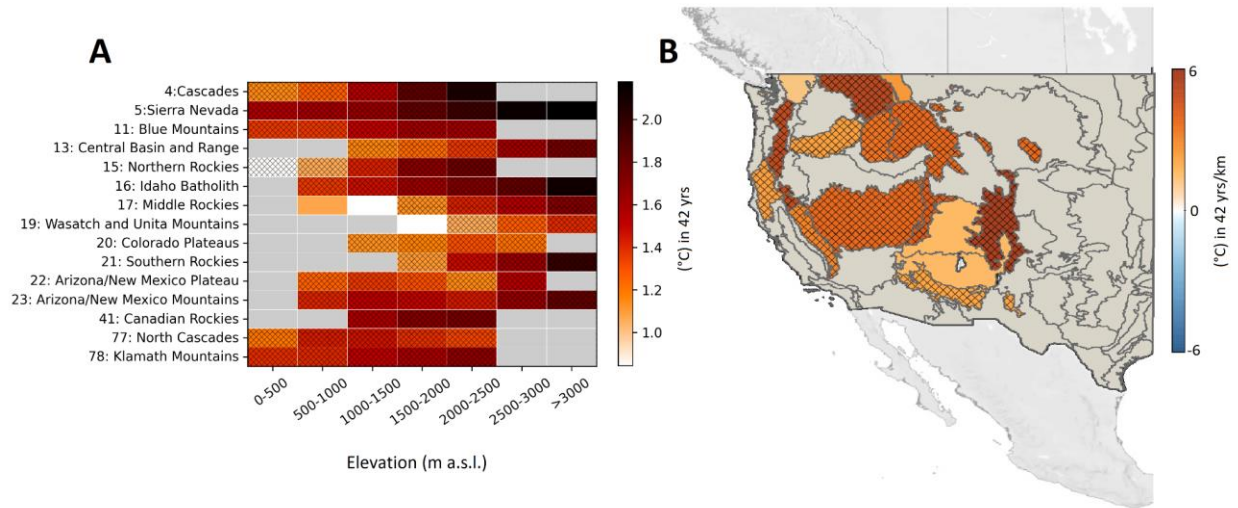

**Figure S2. Elevation-dependent intensification of Temperature. (A)** Temporal trends in warm-season average daily Temperature from 1979-2020 in each elevation band in each mountainous ecoregion of the western US. **(B)** Slope of temporal Temperature trends across elevation bands. (© OpenStreetMap contributors 2017. Distributed under the Open Data Commons Open Database License (ODbL) v1.0.)<sup>35</sup>.

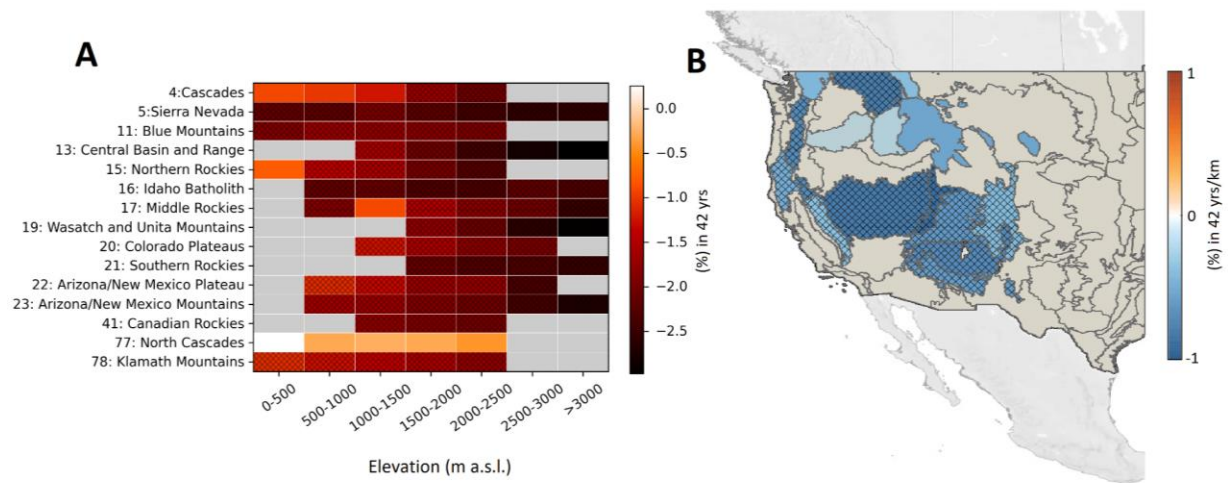

**Figure S3. Elevation-dependent intensification of 100-hour dead fuel moisture, FM100. (A)** Temporal trends in warm-season **FM100** from 1979-2020 in each elevation band in each mountainous ecoregion of the western US. **(B)** Slope of temporal **FM100** trends across elevation bands. (© OpenStreetMap contributors 2017. Distributed under the Open Data Commons Open Database License (ODbL) v1.0.)<sup>35</sup>.

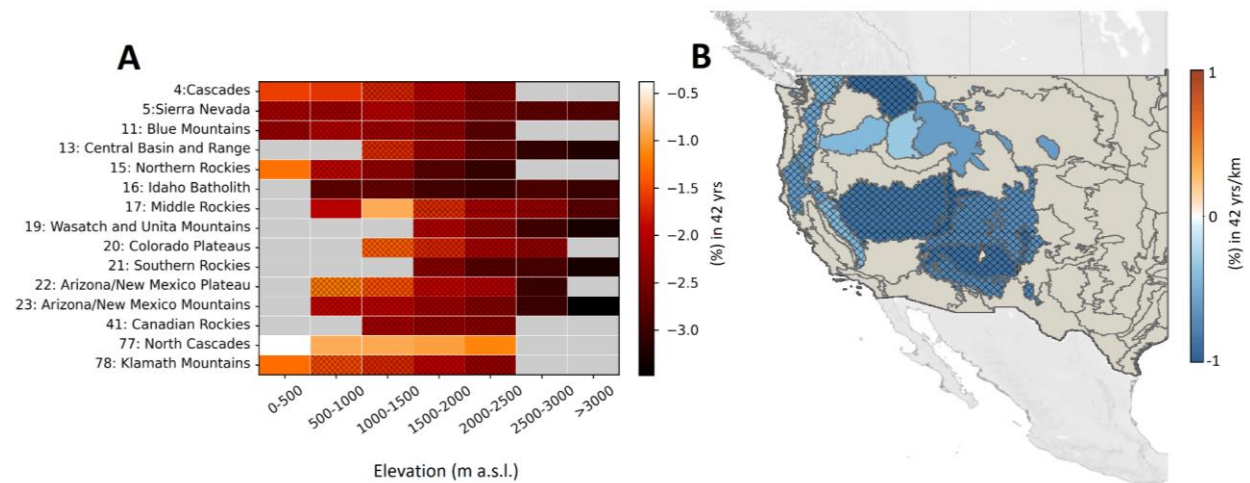

**Figure S4. Elevation-dependent intensification of 1000-hour dead fuel moisture, FM1000. (A)** Temporal trends in warm-season **FM1000** from 1979-2020 in each elevation band in each mountainous ecoregion of the western US. **(B)** Slope of temporal **FM1000** trends across elevation bands. (© OpenStreetMap contributors 2017. Distributed under the Open Data Commons Open Database License (ODbL) v1.0.)<sup>35</sup>.

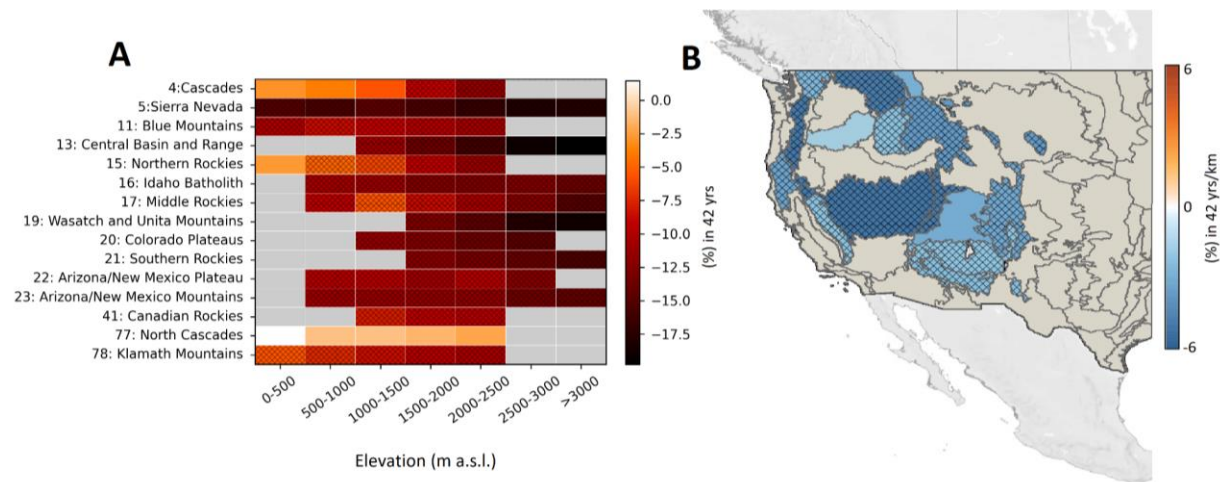

**Figure S5. Elevation-dependent intensification of warm-season daily maximum relative humidity. (A)** Temporal trends in warm-season **daily maximum relative humidity** from 1979-2020 in each elevation band in each mountainous ecoregion of the western US. **(B)** Slope of temporal **daily maximum relative humidity** trends across elevation bands. (© OpenStreetMap contributors 2017. Distributed under the Open Data Commons Open Database License (ODbL) v1.0.)<sup>35</sup>.

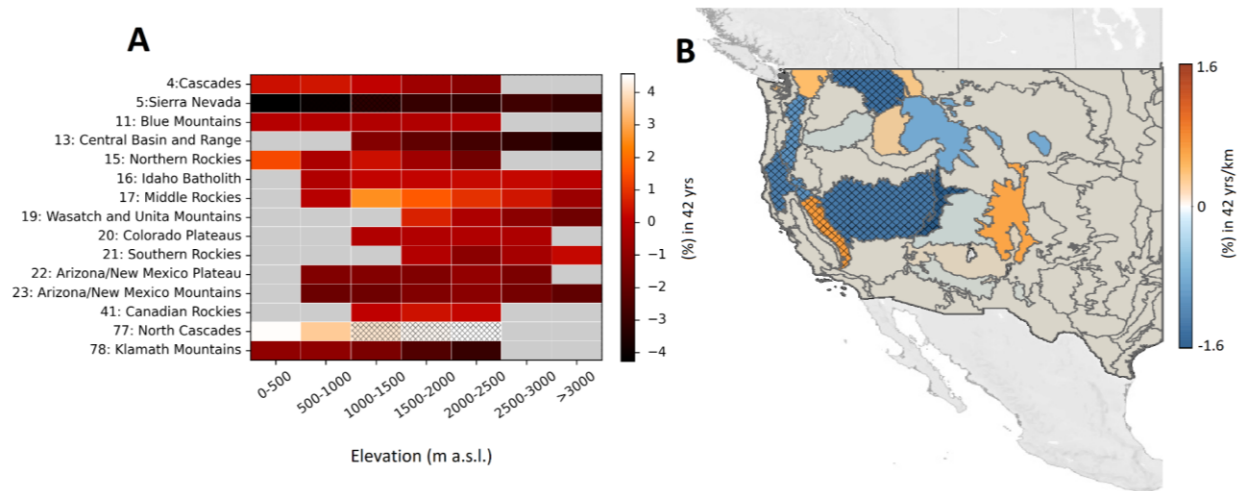

**Figure S6. Elevation-dependent intensification of warm-season daily minimum relative humidity. (A)** Temporal trends in warm-season **daily minimum relative humidity** from 1979-2020 in each elevation band in each mountainous ecoregion of the western US. **(B)** Slope of temporal **daily minimum relative humidity** trends across elevation bands. (© OpenStreetMap contributors 2017. Distributed under the Open Data Commons Open Database License (ODbL) v1.0.)<sup>35</sup>.



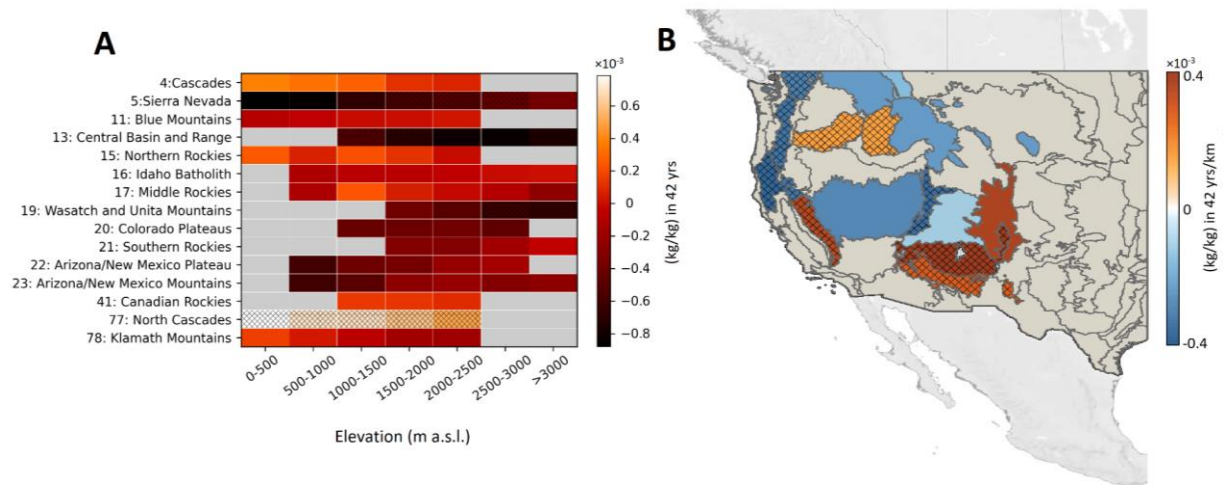

**Figure S7. Elevation-dependent intensification of warm-season daily specific humidity. (A)** Temporal trends in warm-season **daily specific humidity** from 1979-2020 in each elevation band in each mountainous ecoregion of the western US. **(B)** Slope of temporal **daily specific humidity** trends across elevation bands. (© OpenStreetMap contributors 2017. Distributed under the Open Data Commons Open Database License (ODbL) v1.0.)<sup>35</sup>.

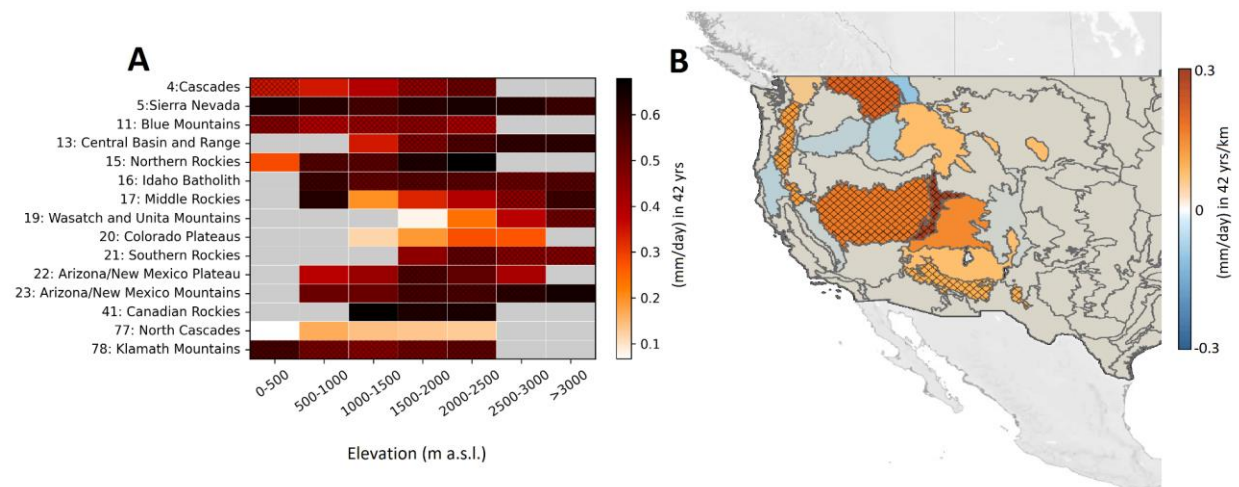

**Figure S8. Elevation-dependent intensification of warm-season daily reference evapotranspiration. (A)** Temporal trends in warm-season **daily reference evapotranspiration** from 1979-2020 in each elevation band in each mountainous ecoregion of the western US. **(B)** Slope of temporal **daily reference evapotranspiration** trends across elevation bands. (© OpenStreetMap contributors 2017. Distributed under the Open Data Commons Open Database License (ODbL) v1.0.)<sup>35</sup>.

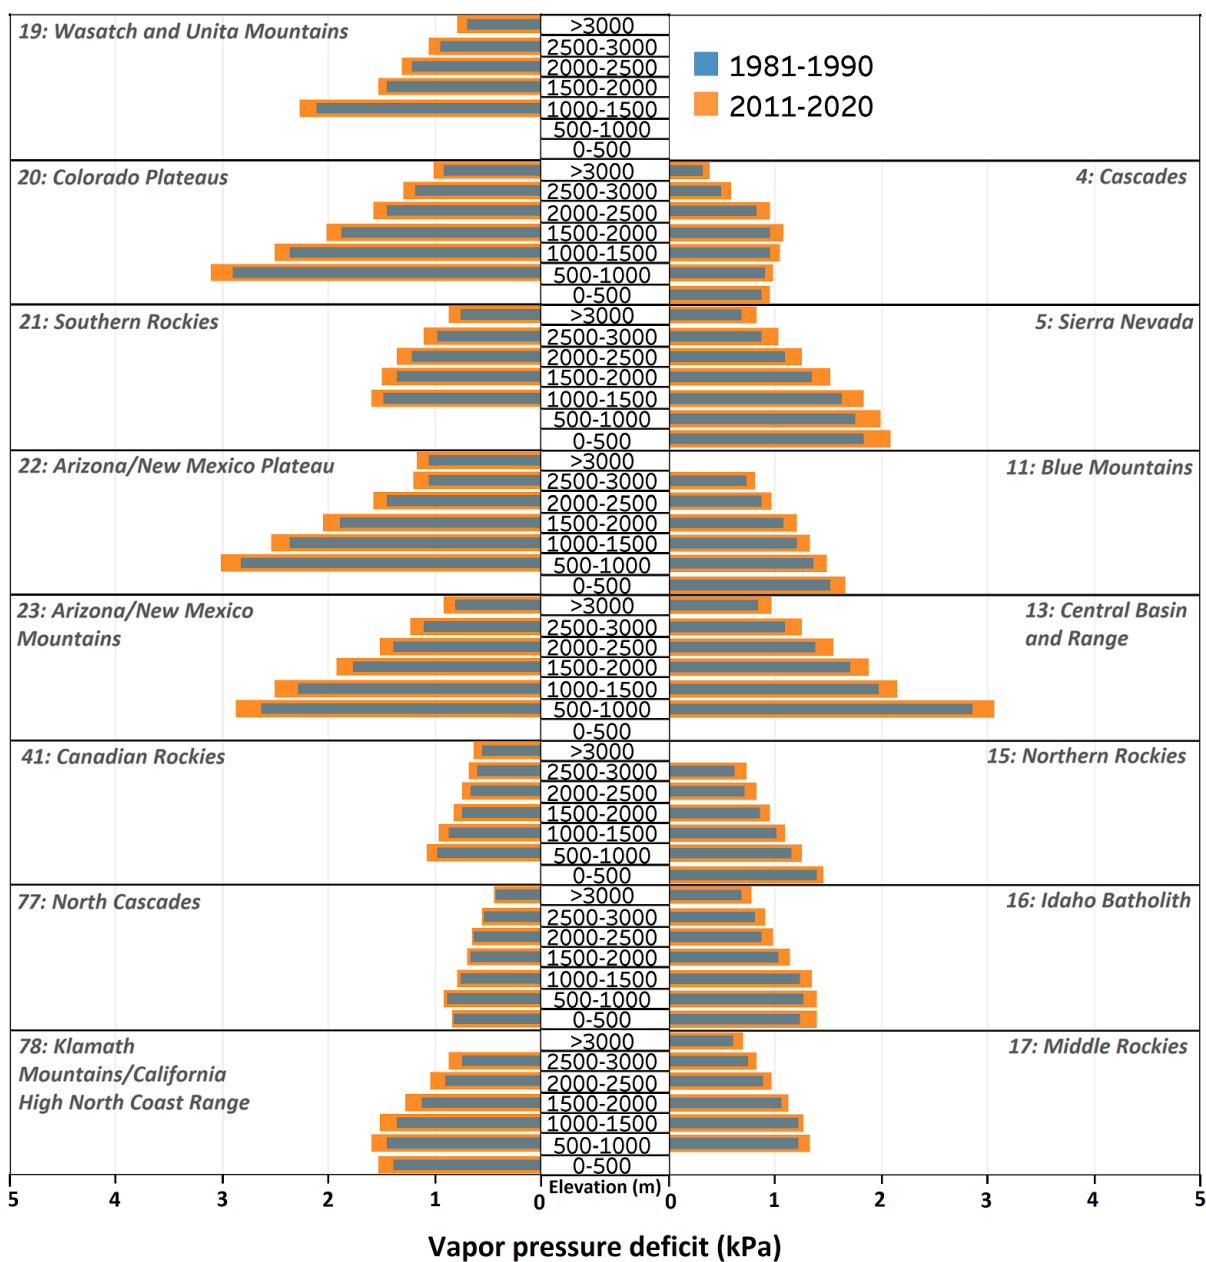

**Figure S9. Decadal average warm-season VPD in each elevation band in each ecoregion. Results for 1981-1990 and 2011-2020 are shown in blue and orange colors, respectively.**

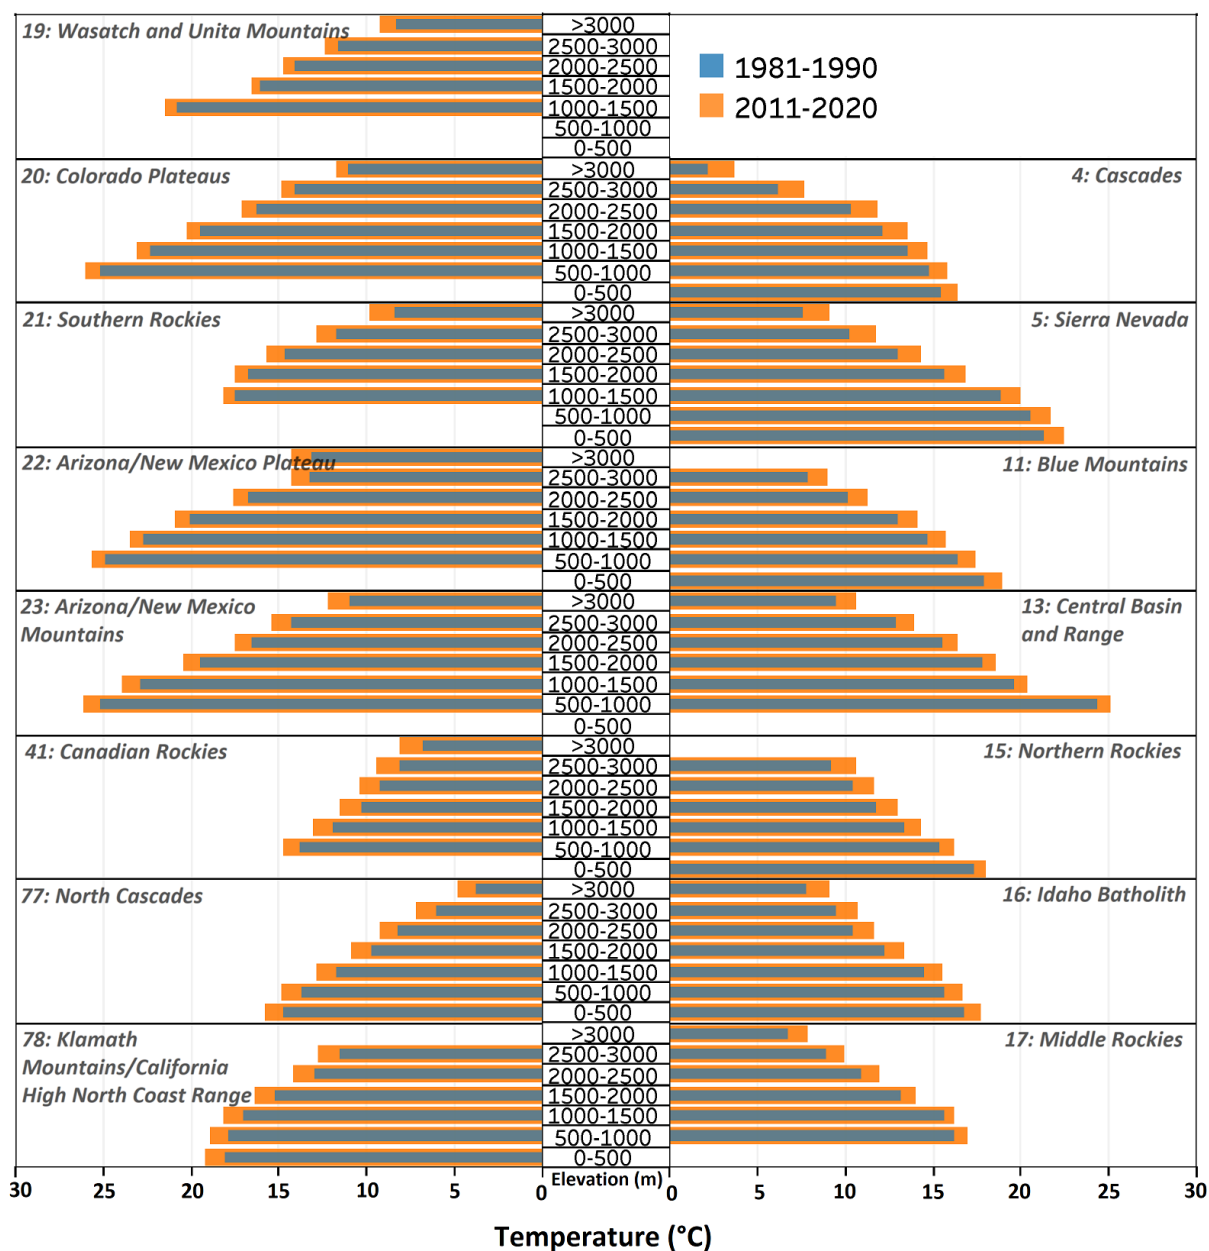

**Figure S10. Decadal average warm-season Temperature in each elevation band in each ecoregion.** Results for 1981-1990 and 2011-2020 are shown in blue and orange colors, respectively.

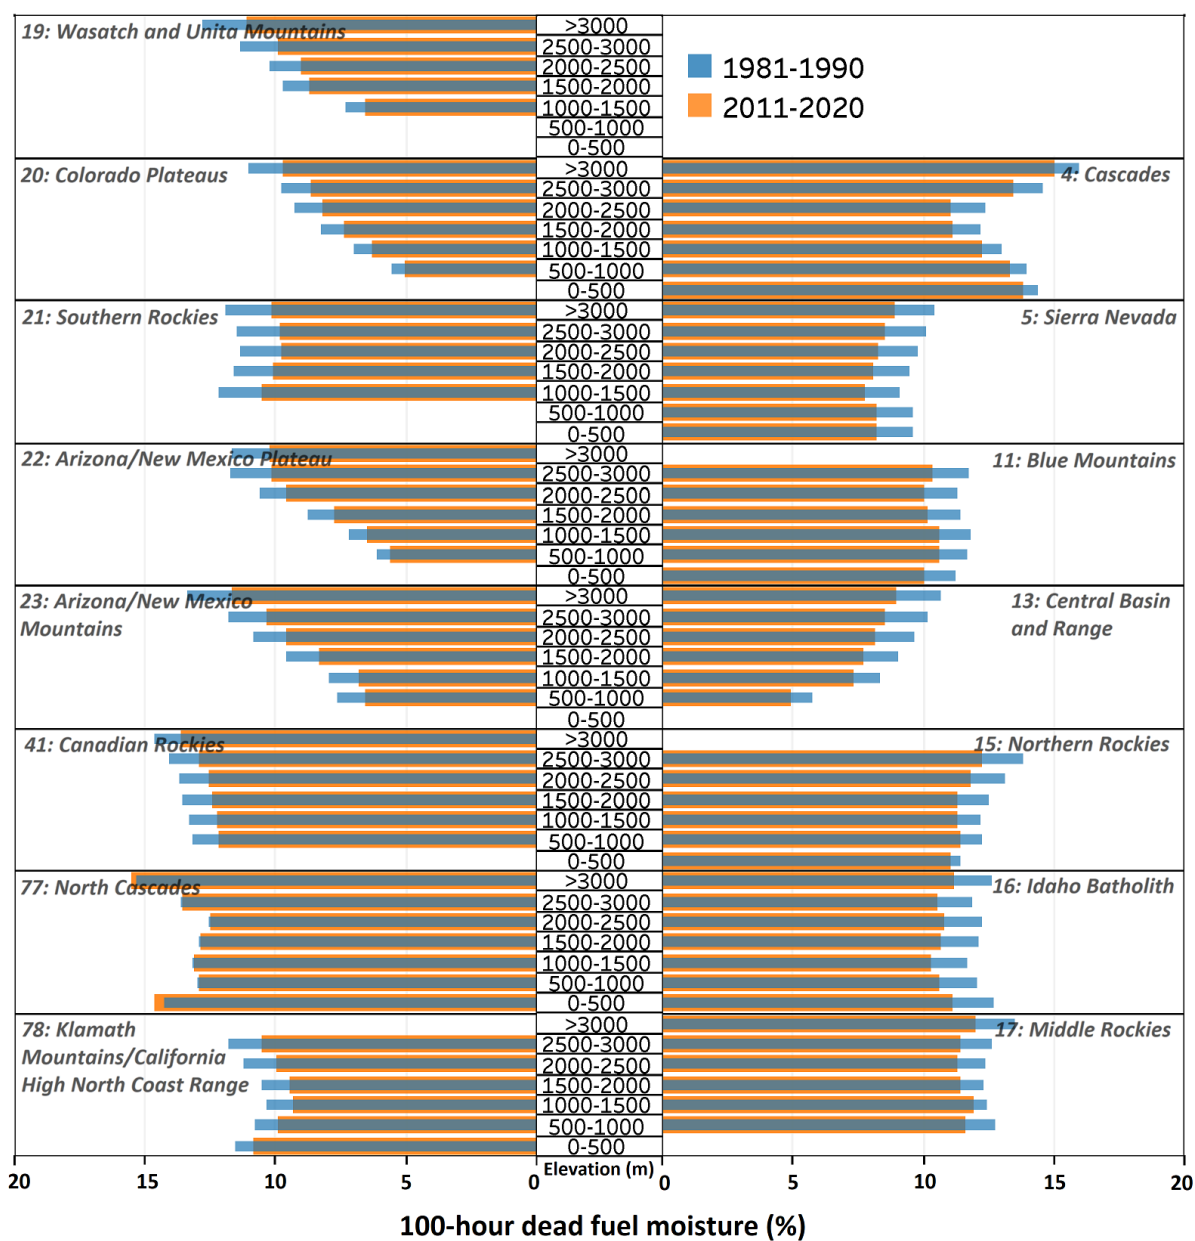

**Figure S11. Decadal average warm-season FM100 in each elevation band in each ecoregion. Results for 1981-1990 and 2011-2020 are shown in blue and orange colors, respectively.**



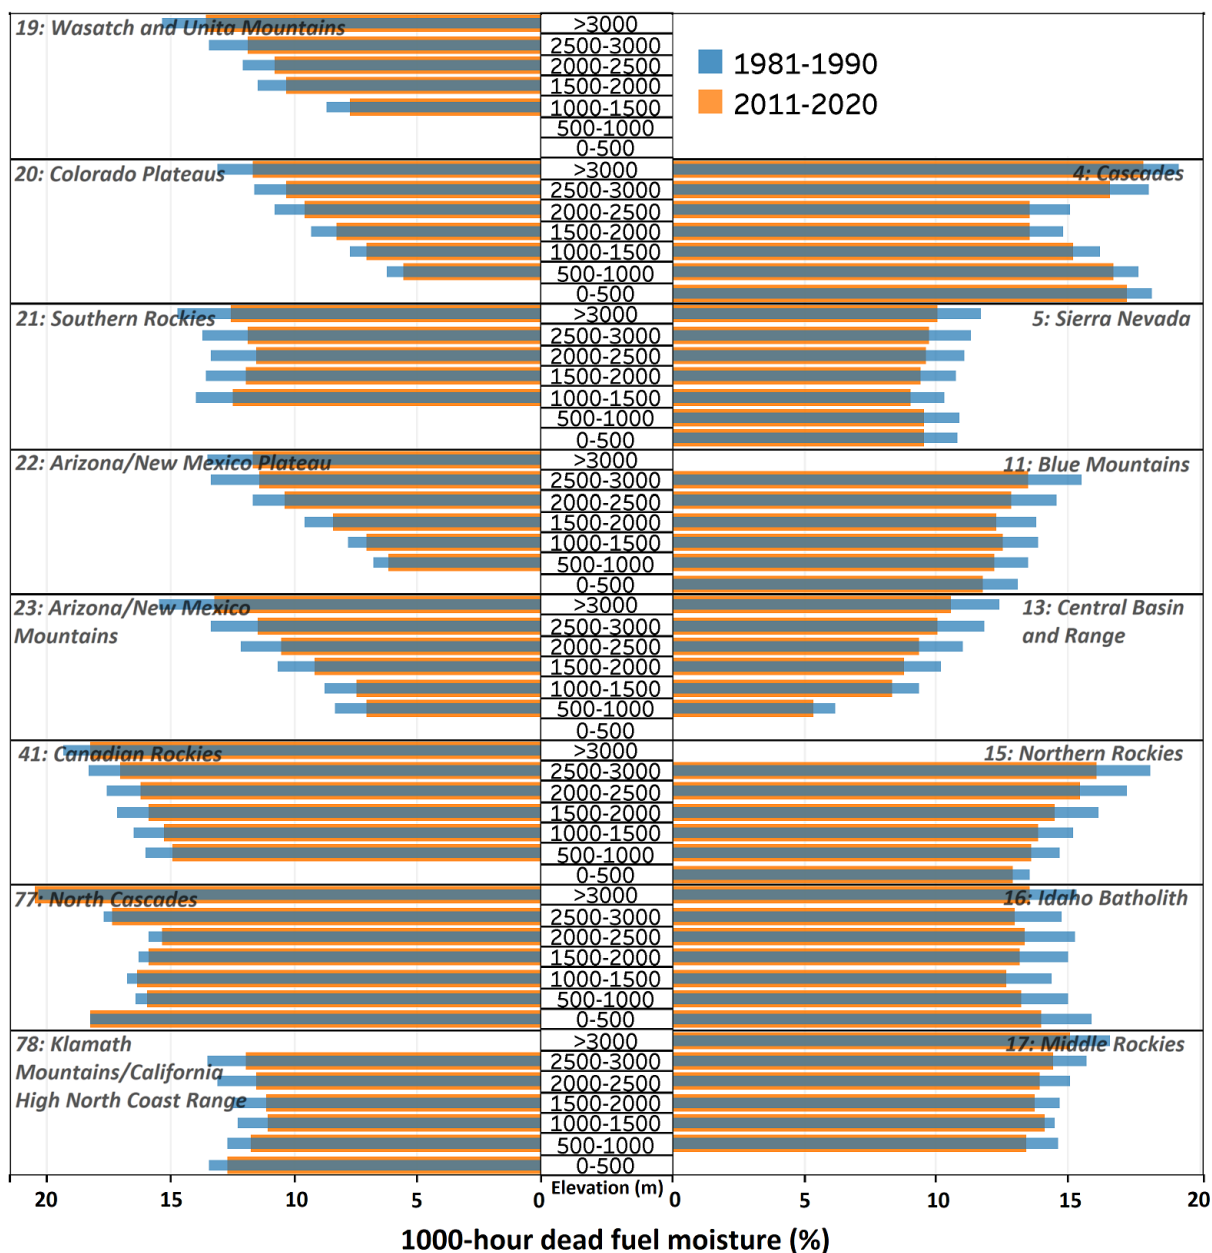

**Figure S12. Decadal average warm-season FM1000 in each elevation band in each ecoregion. Results for 1981-1990 and 2011-2020 are shown in blue and orange colors, respectively.**

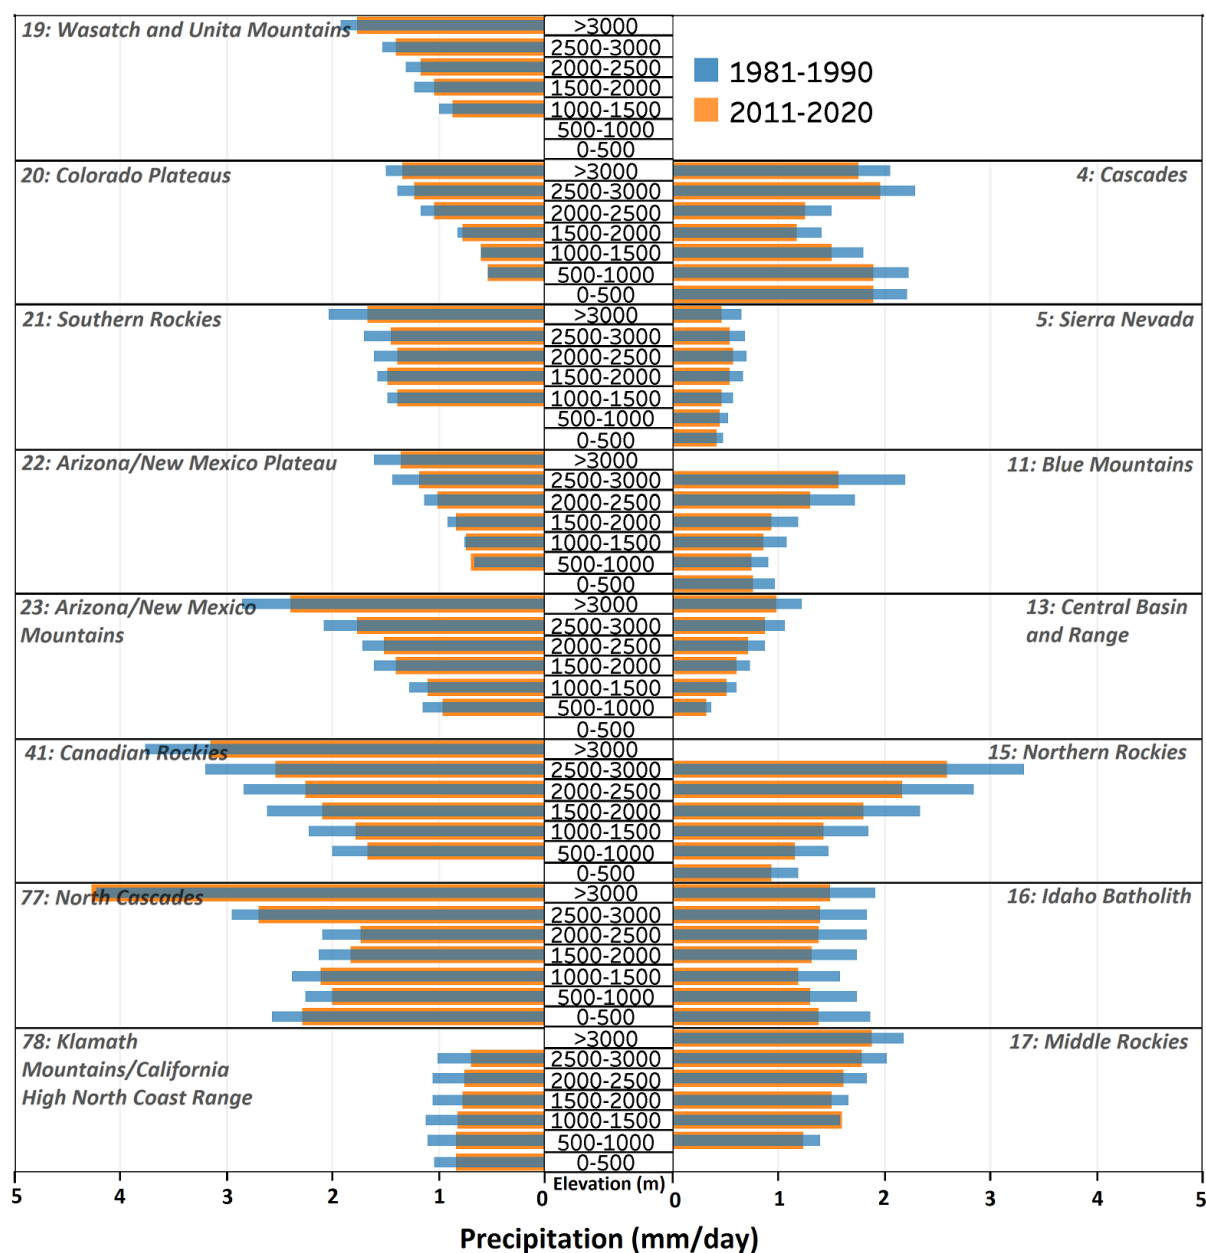

**Figure S13. Decadal average warm-season precipitation in each elevation band in each ecoregion.**  
Results for 1981-1990 and 2011-2020 are shown in blue and orange colors, respectively.

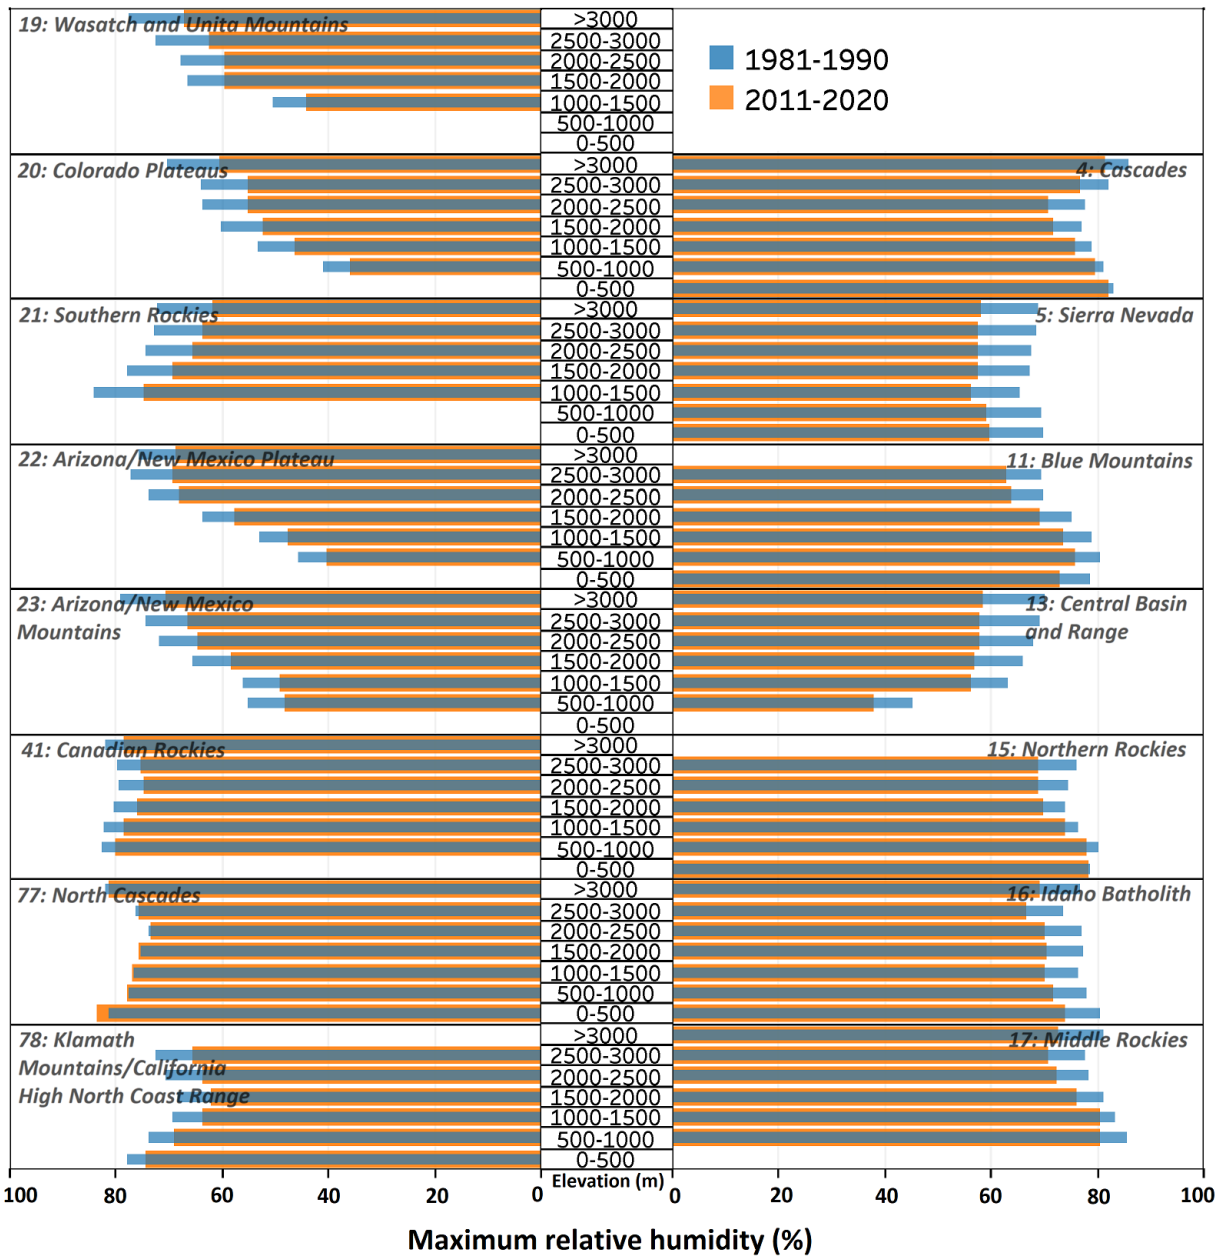

**Figure S14. Decadal average warm-season maximum daily relative humidity in each elevation band in each ecoregion. Results for 1981-1990 and 2011-2020 are shown in blue and orange colors, respectively.**

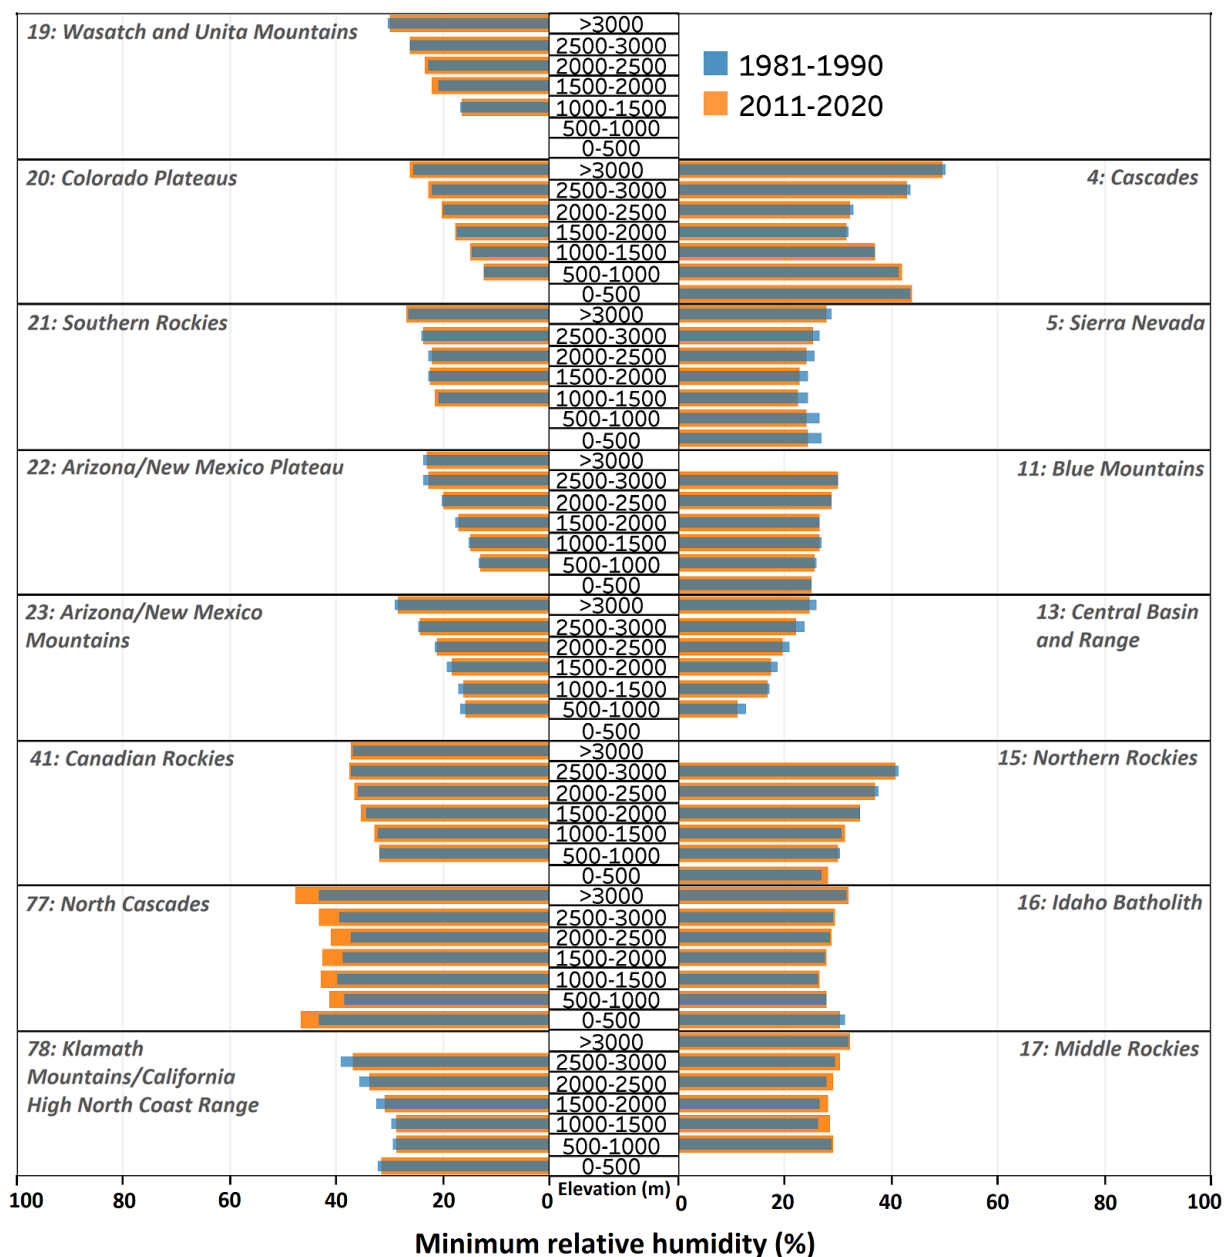

**Figure S15. Decadal average warm-season minimum daily relative humidity in each elevation band in each ecoregion.** Results for 1981-1990 and 2011-2020 are shown in blue and orange colors, respectively.

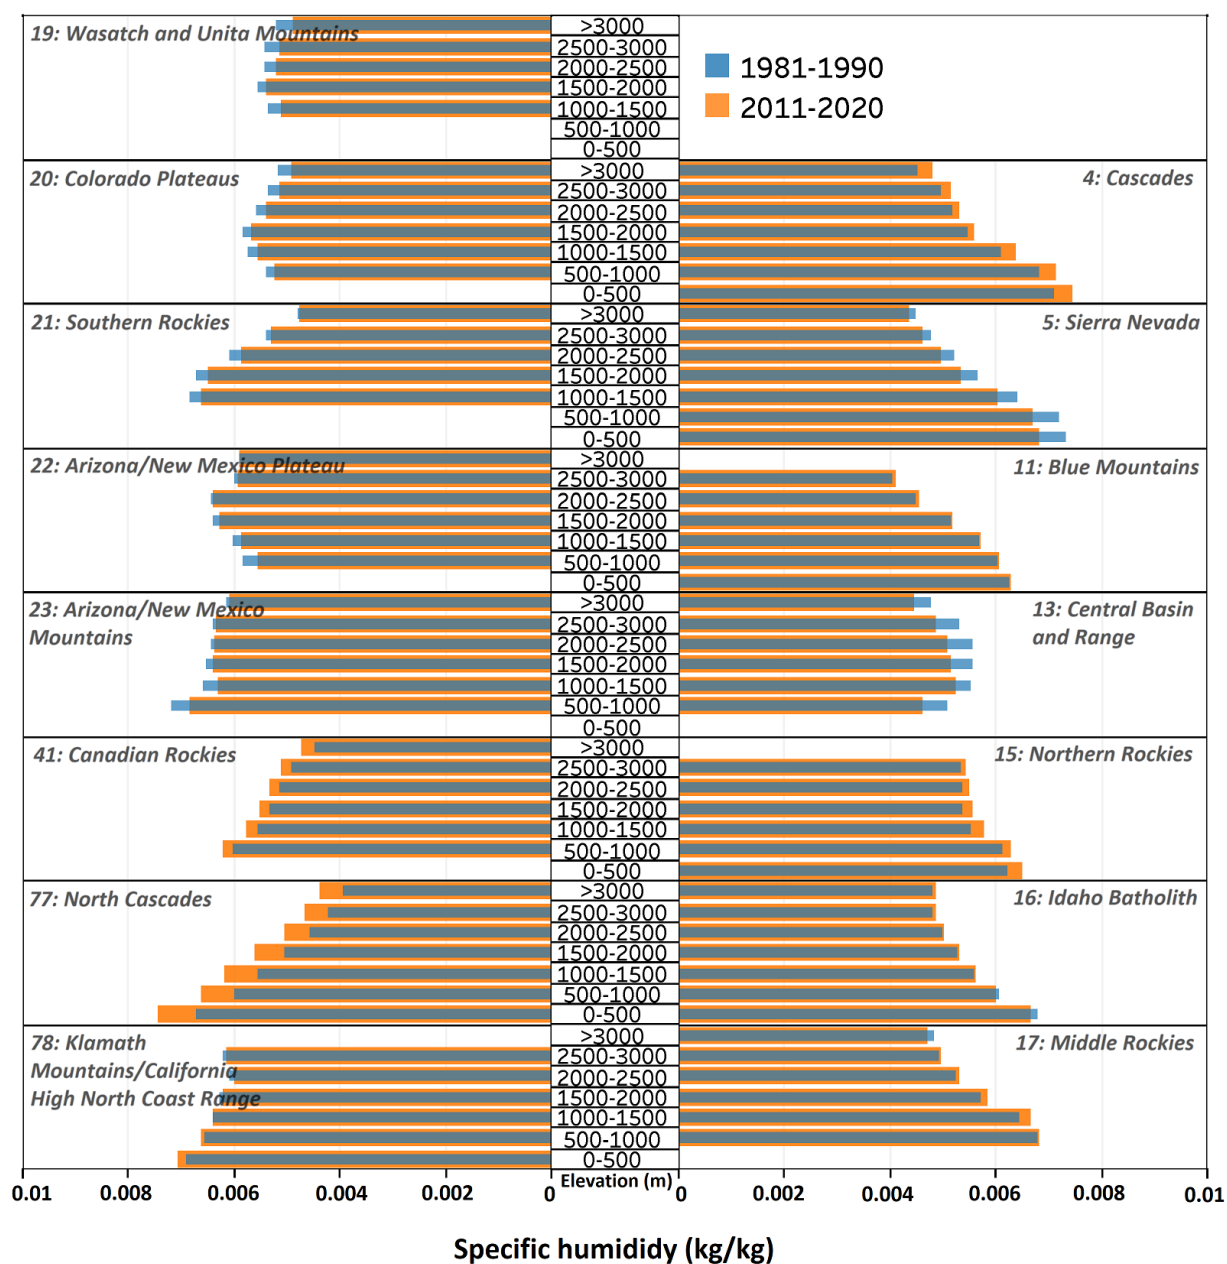

**Figure S16. Decadal average warm-season specific humidity in each elevation band in each ecoregion.** Results for 1981-1990 and 2011-2020 are shown in blue and orange colors, respectively.

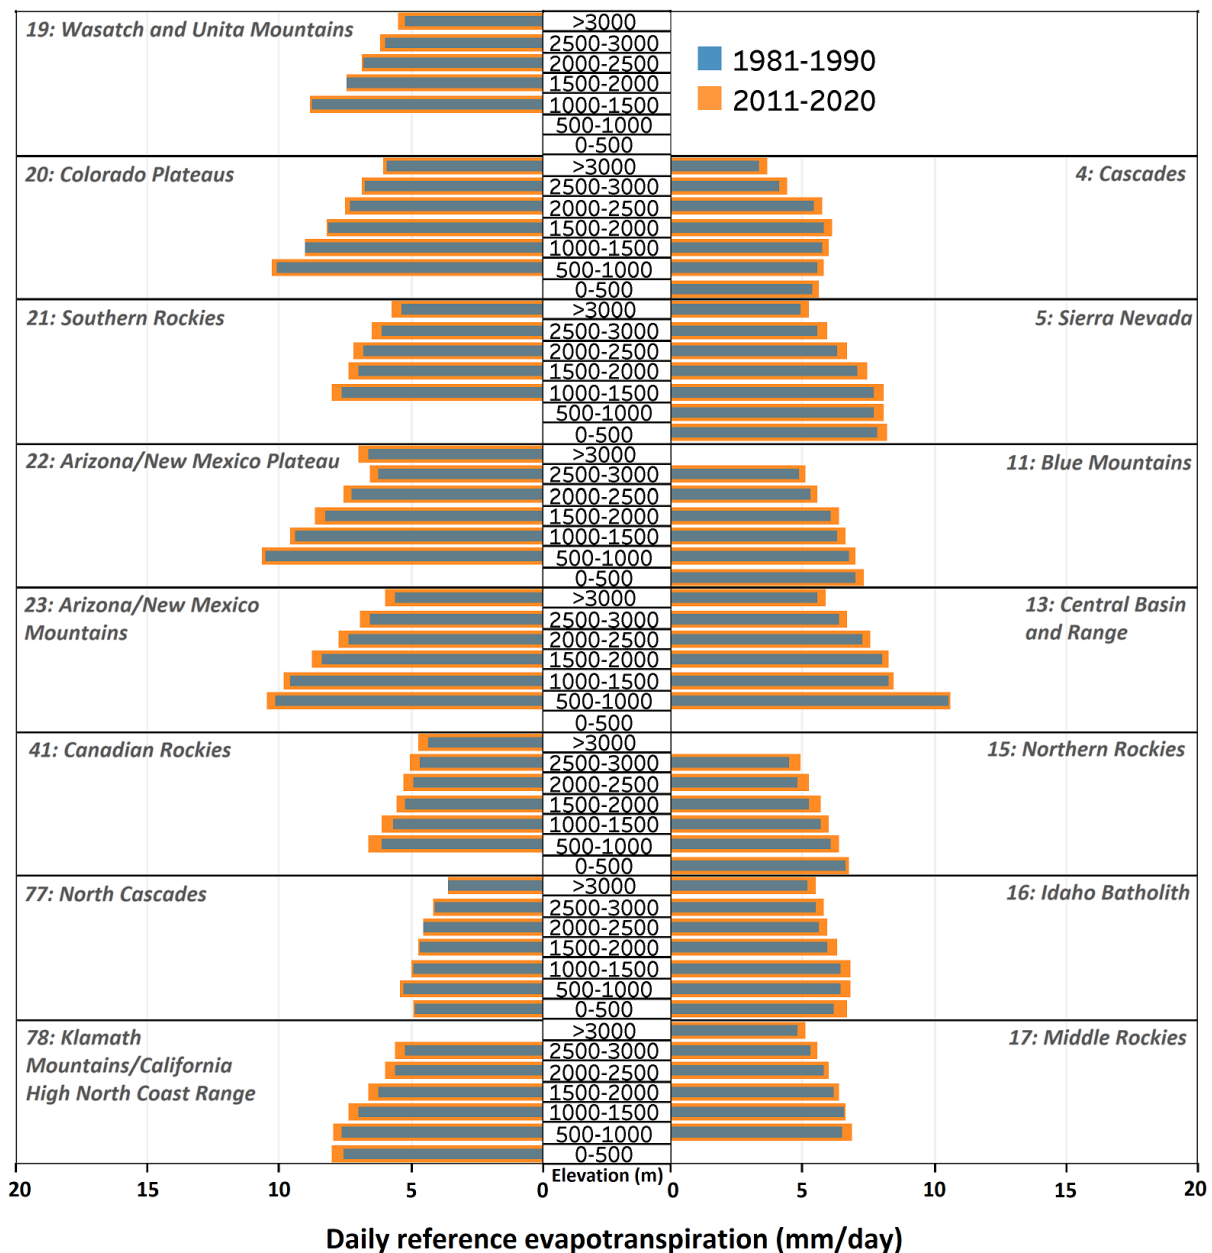

**Figure S17. Decadal average warm-season daily reference evapotranspiration in each elevation band in each ecoregion.** Results for 1981-1990 and 2011-2020 are shown in blue and orange colors, respectively.

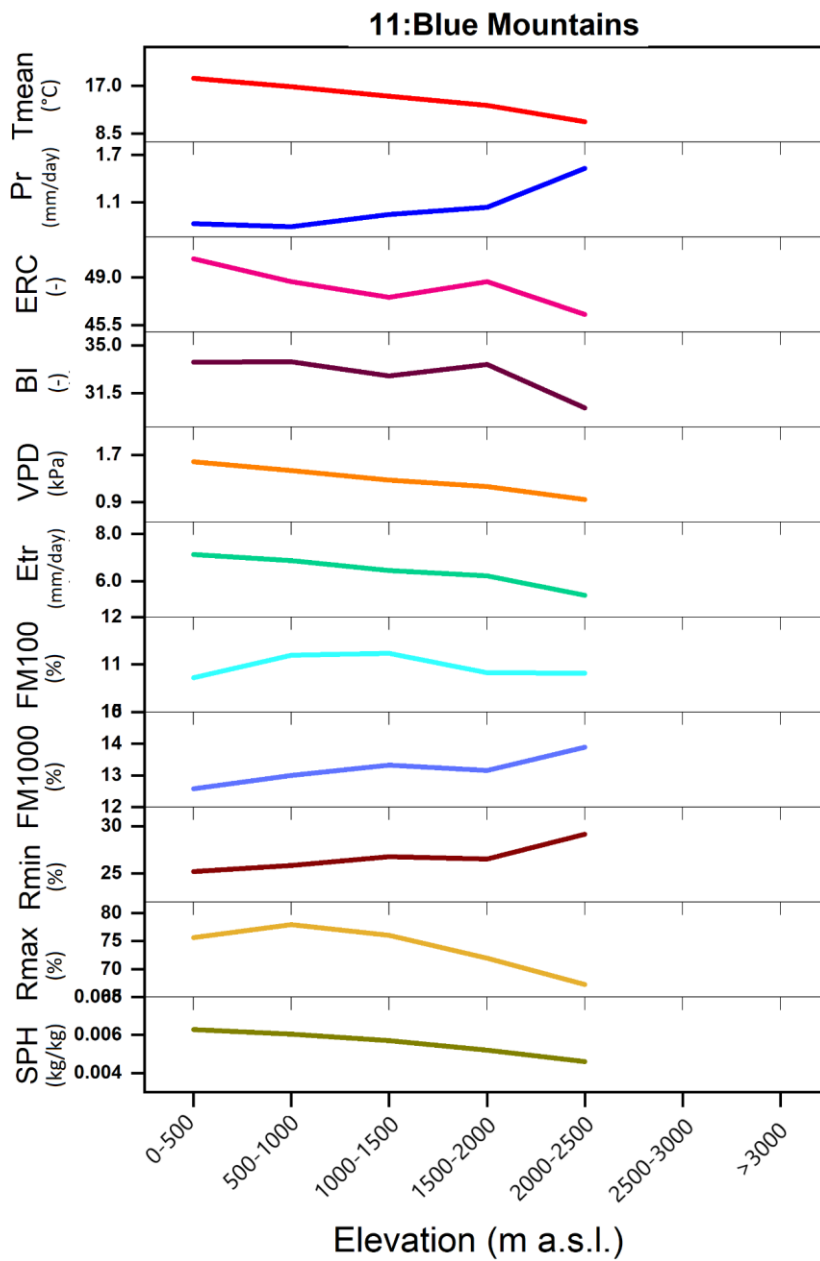

**Figure S18. Elevational changes in climatology of meteorological variables and fire danger indices in ecoregion 11: Blue Mountains.**

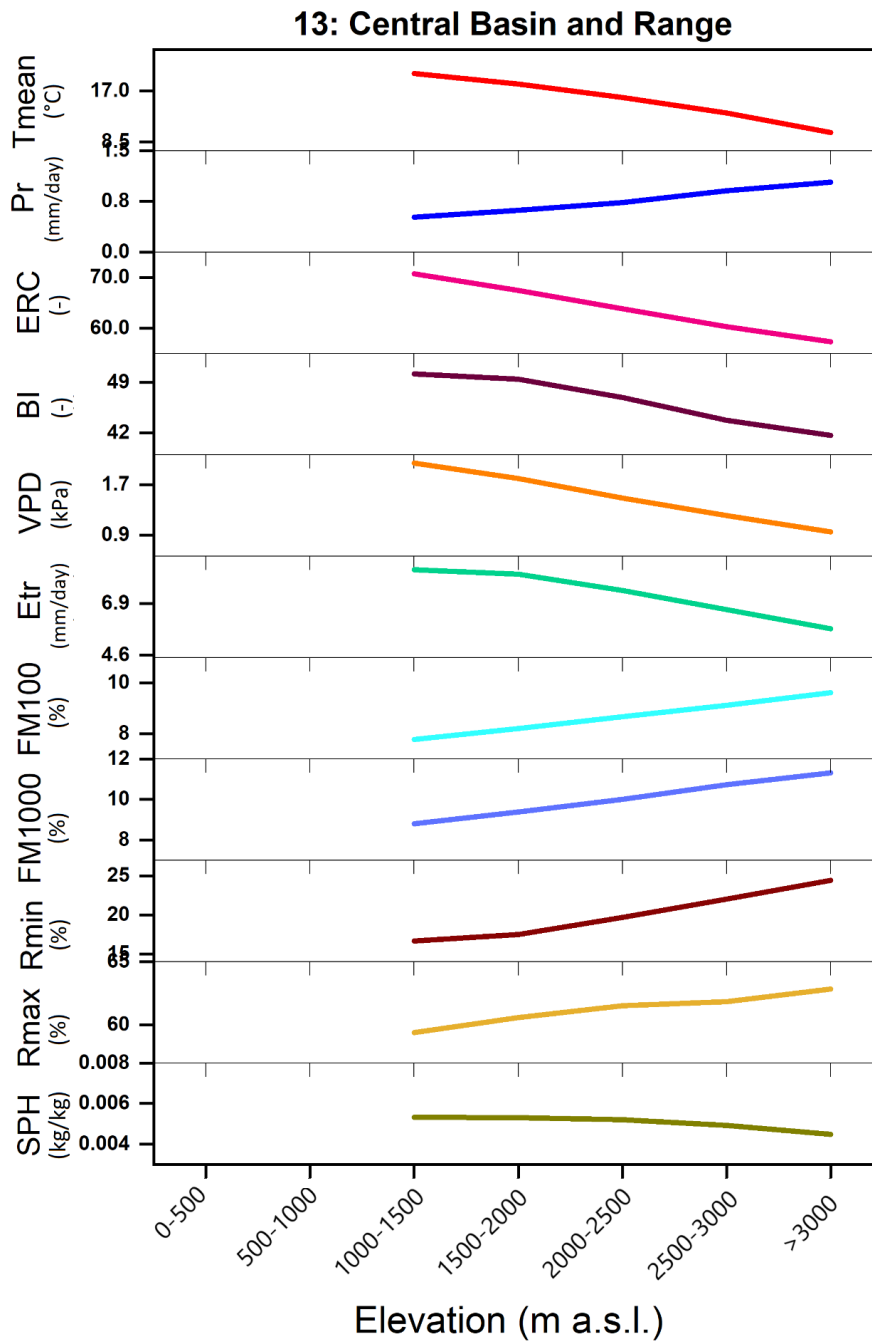

**Figure S19. Elevational changes in climatology of meteorological variables and fire danger indices in ecoregion 13: Central Basin and Range.**



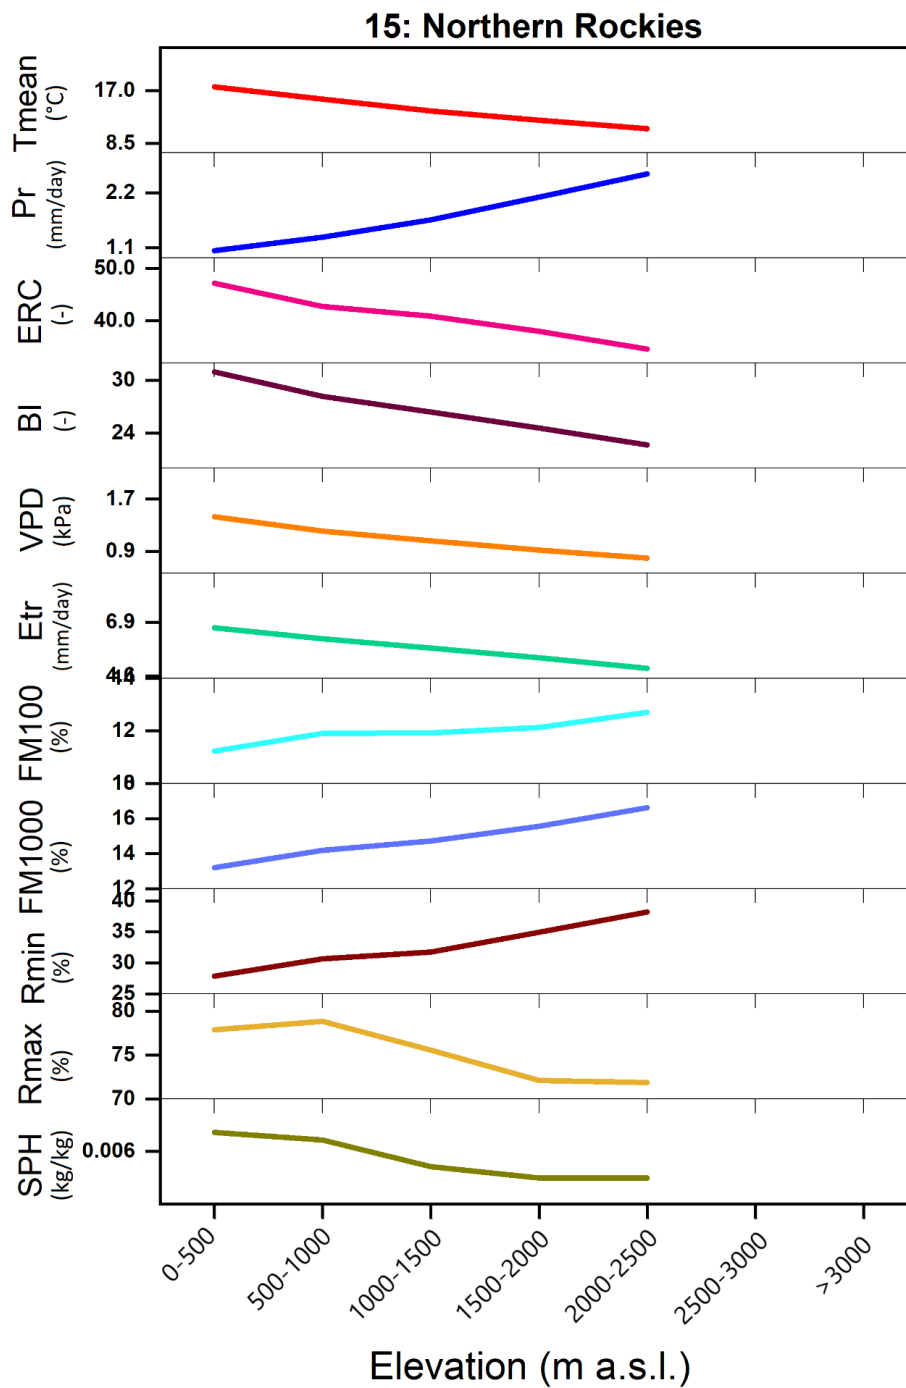

**Figure S20. Elevational changes in climatology of meteorological variables and fire danger indices in ecoregion 15: Northern Rockies.**

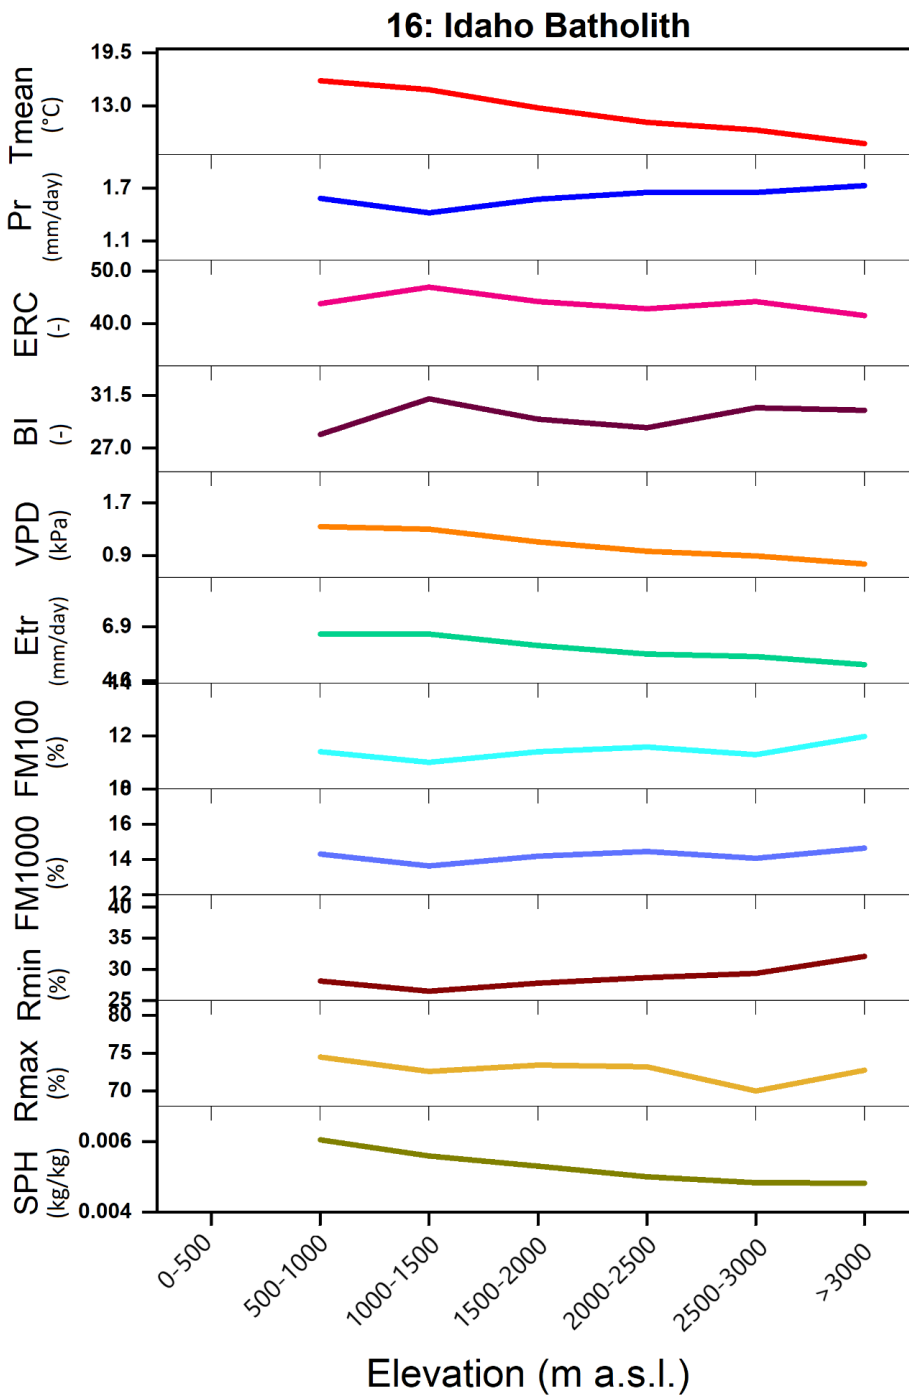

**Figure S21. Elevational changes in climatology of meteorological variables and fire danger indices in ecoregion 16: Idaho Batholith.**

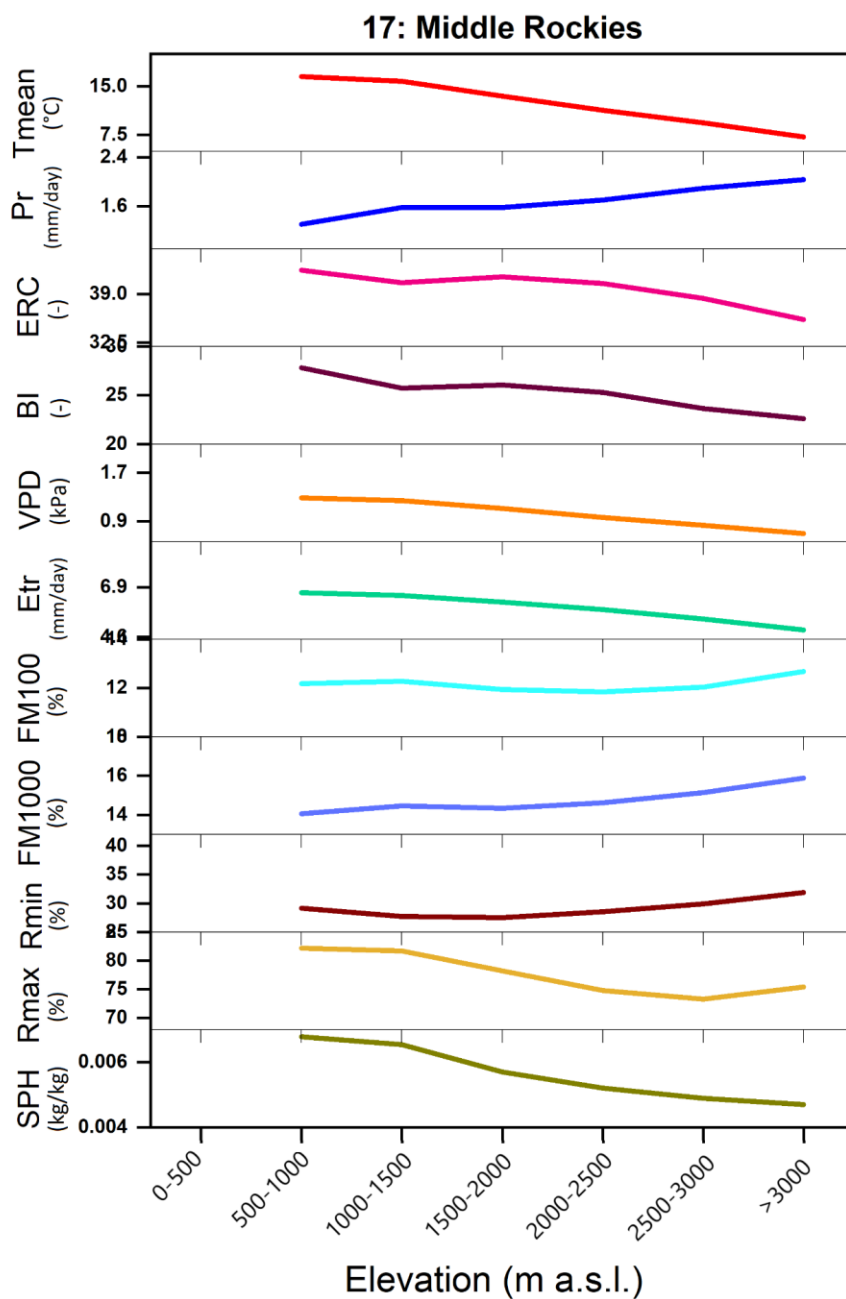

**Figure S22. Elevational changes in climatology of meteorological variables and fire danger indices in ecoregion 17: Middle Rockies.**

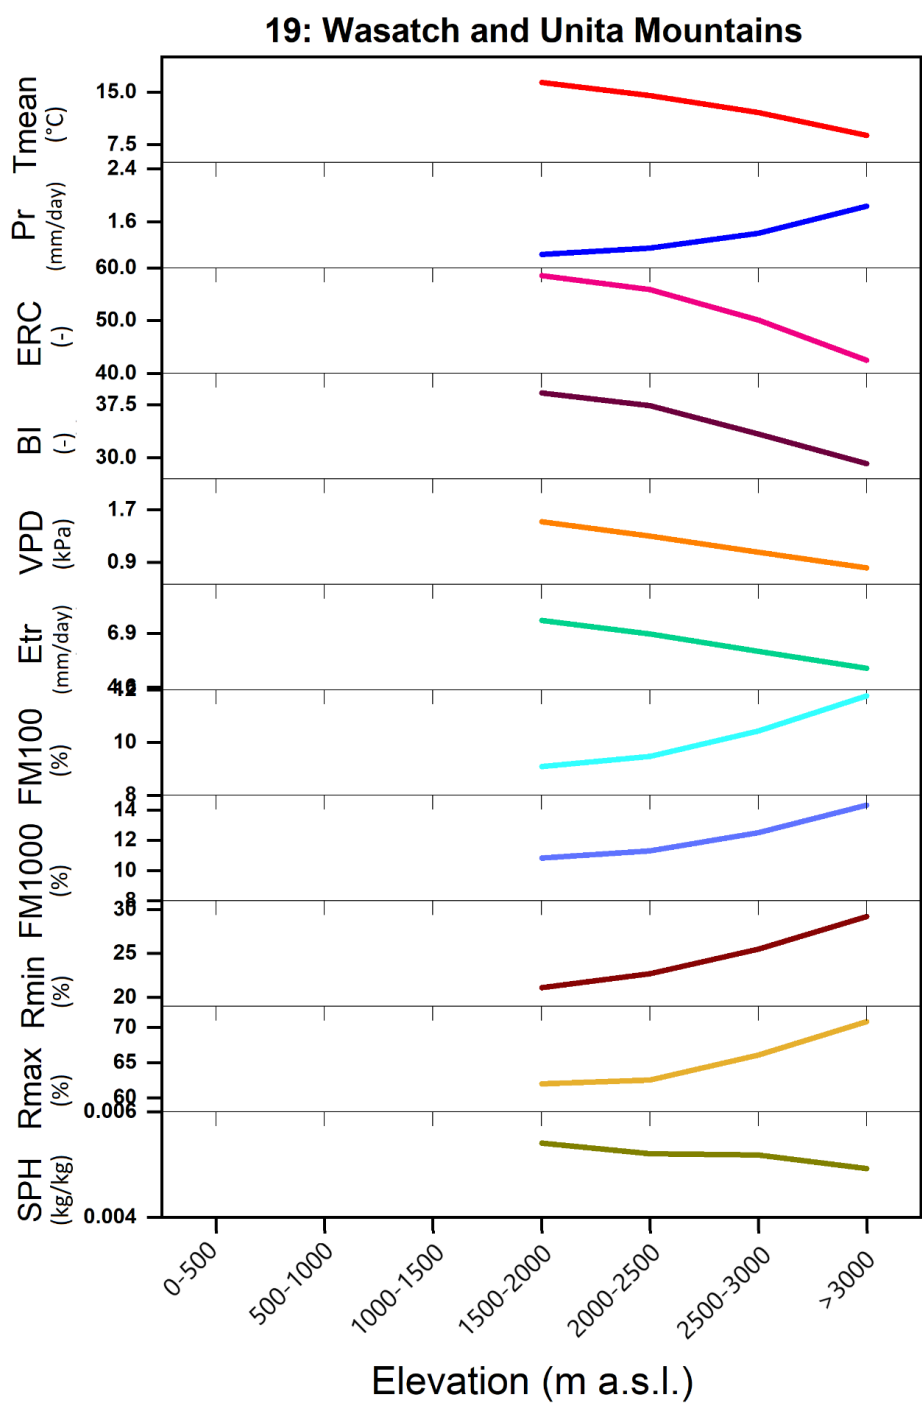

**Figure S23. Elevational changes in climatology of meteorological variables and fire danger indices in ecoregion 19: Wasatch and Unita Mountains.**

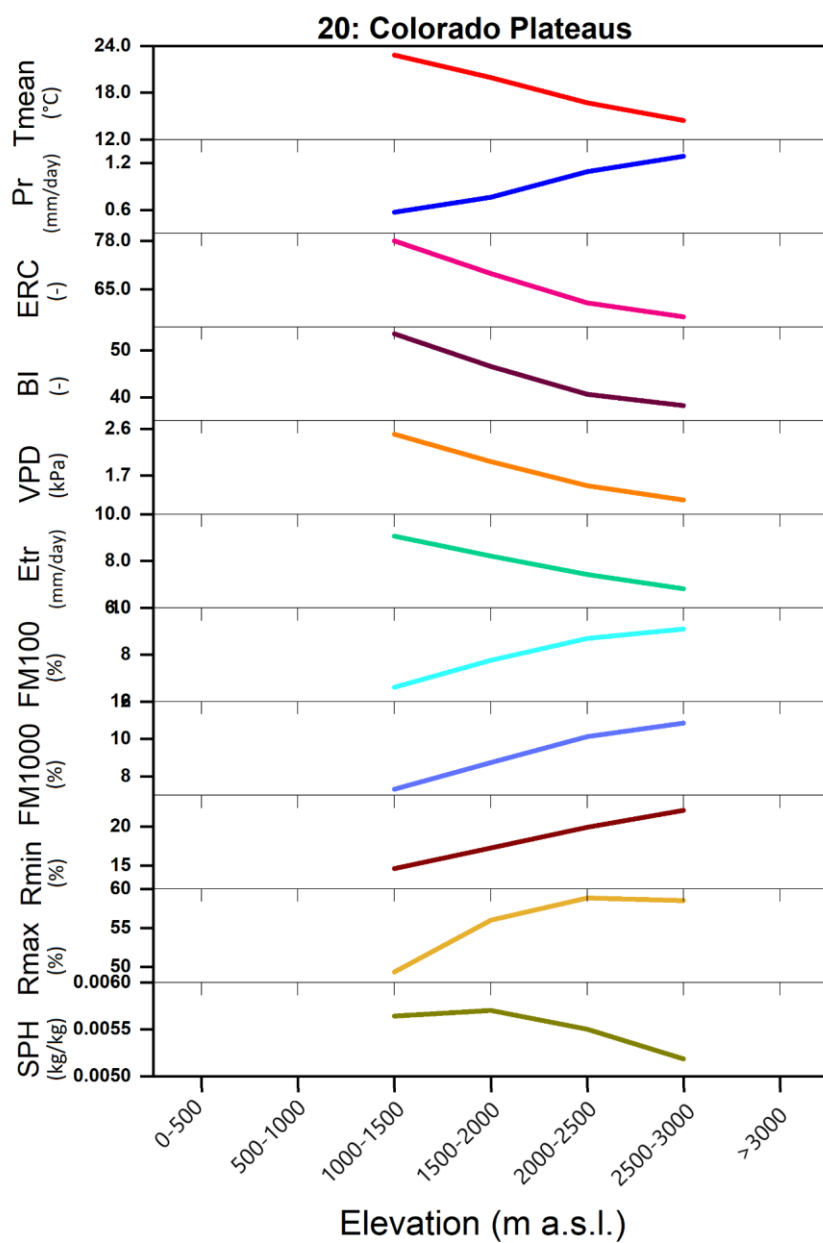

**Figure S24. Elevational changes in climatology of meteorological variables and fire danger indices in ecoregion 20: Colorado Plateau.**

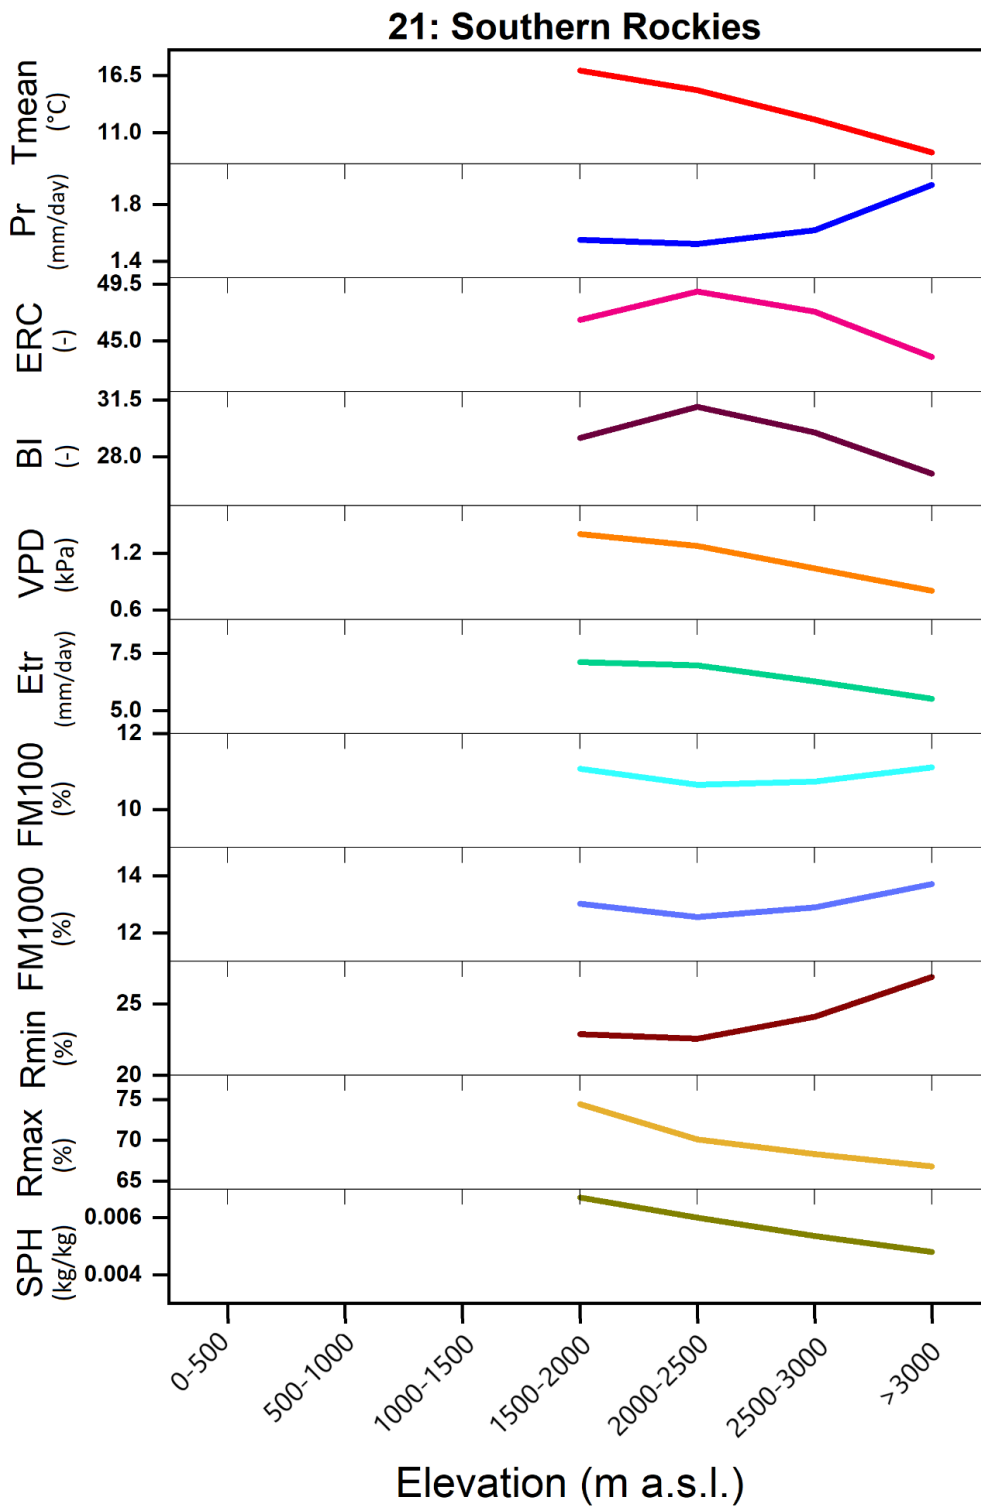

**Figure S25. Elevational changes in climatology of meteorological variables and fire danger indices in ecoregion 21: Southern Rockies.**

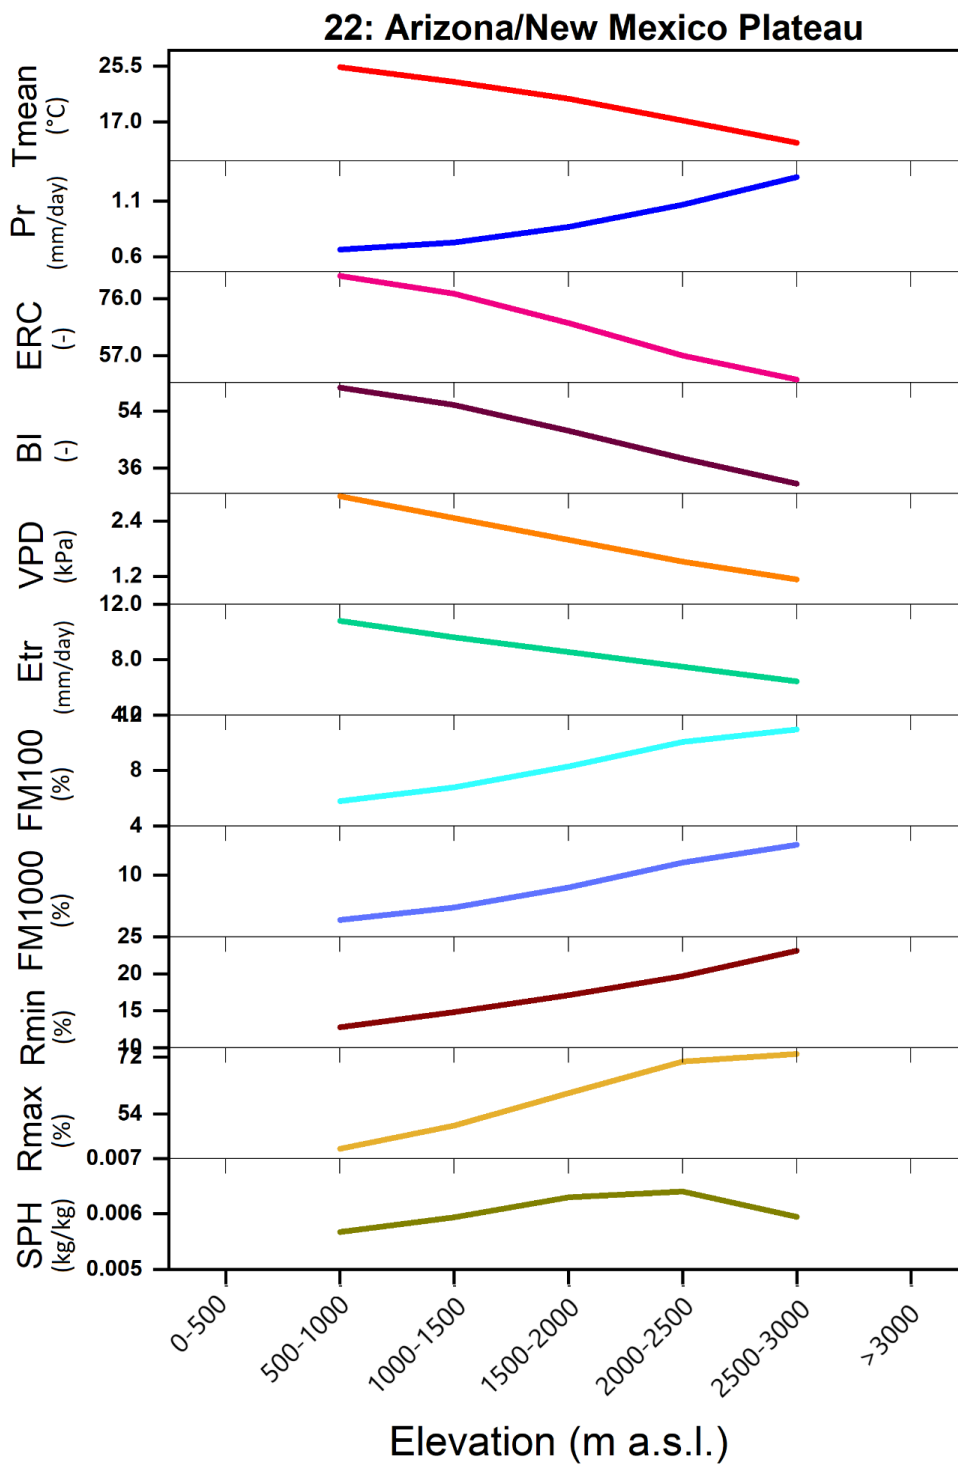

**Figure S26. Elevational changes in climatology of meteorological variables and fire danger indices in ecoregion 22: Arizona/New Mexico Plateau.**

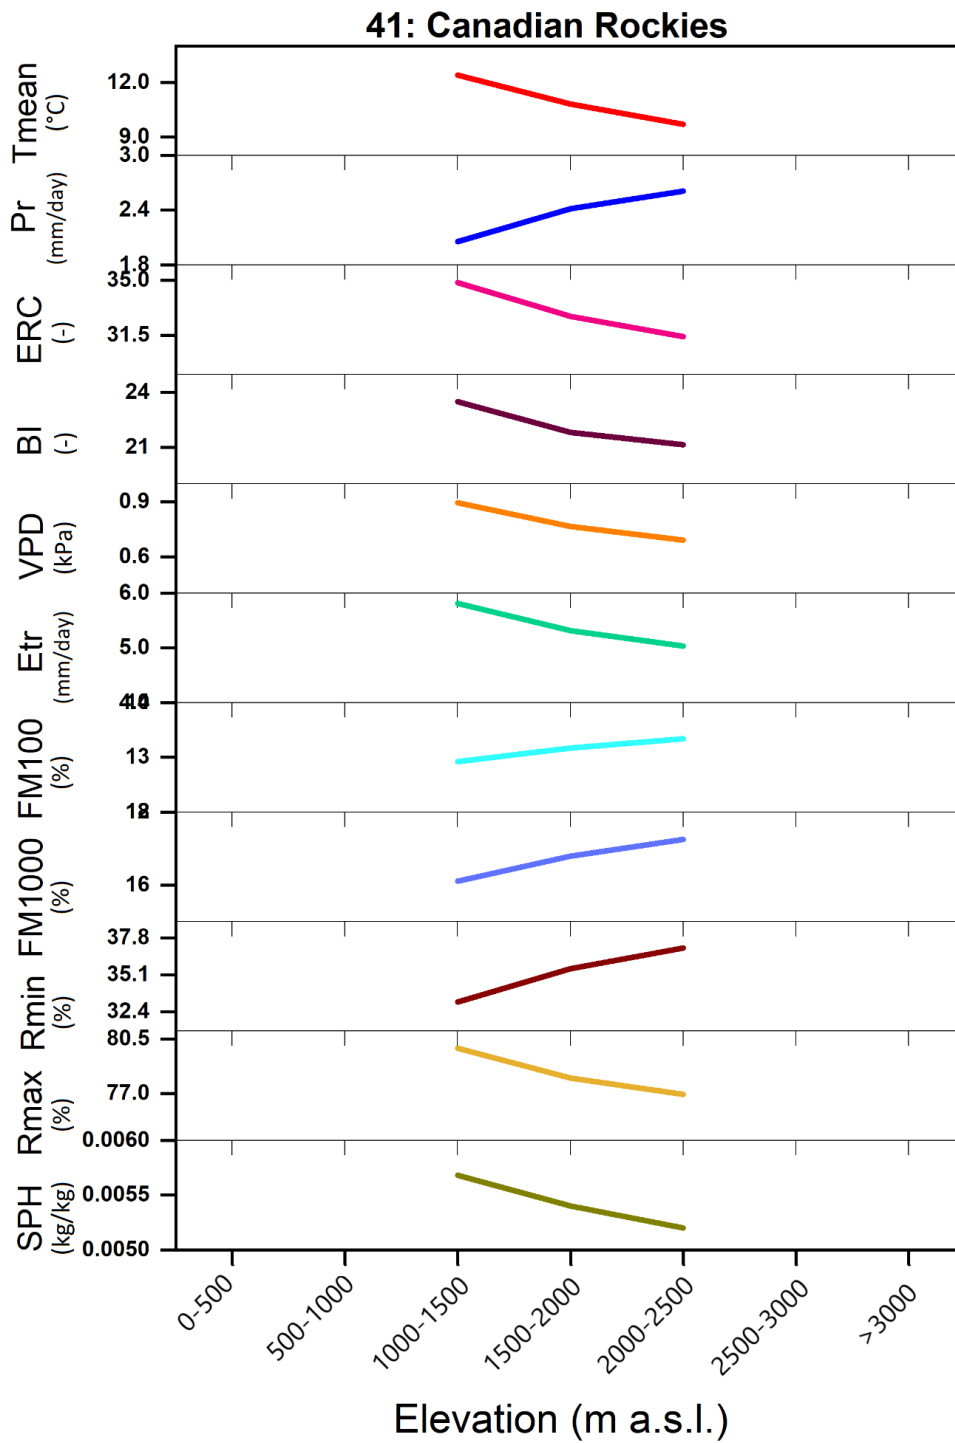

**Figure S27. Elevational changes in climatology of meteorological variables and fire danger indices in ecoregion 41: Canadian Rockies.**



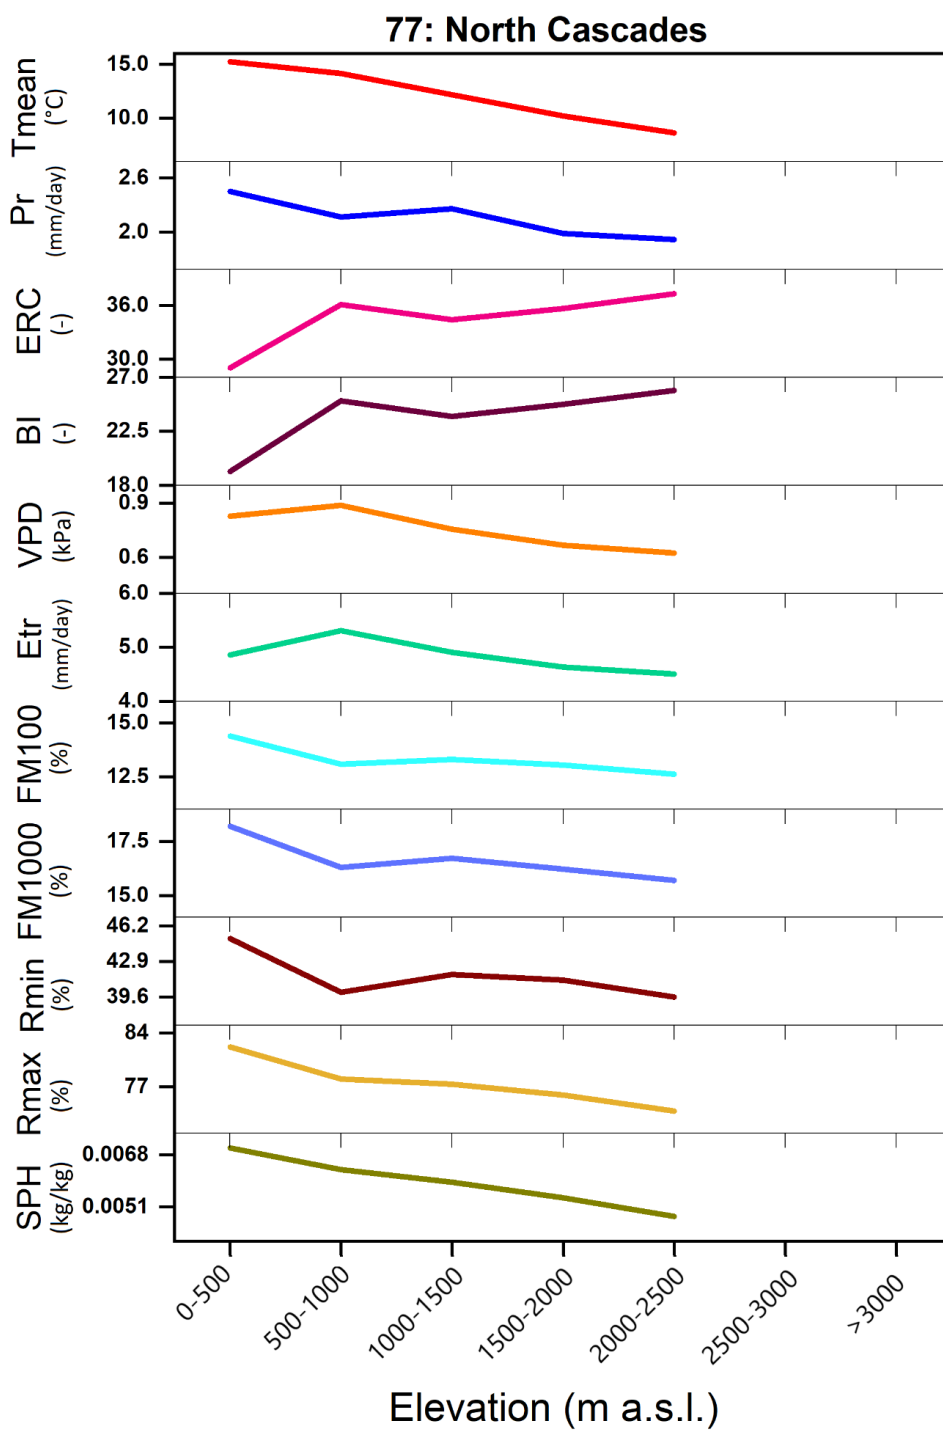

**Figure S28. Elevational changes in climatology of meteorological variables and fire danger indices in ecoregion 77: North Cascades.**

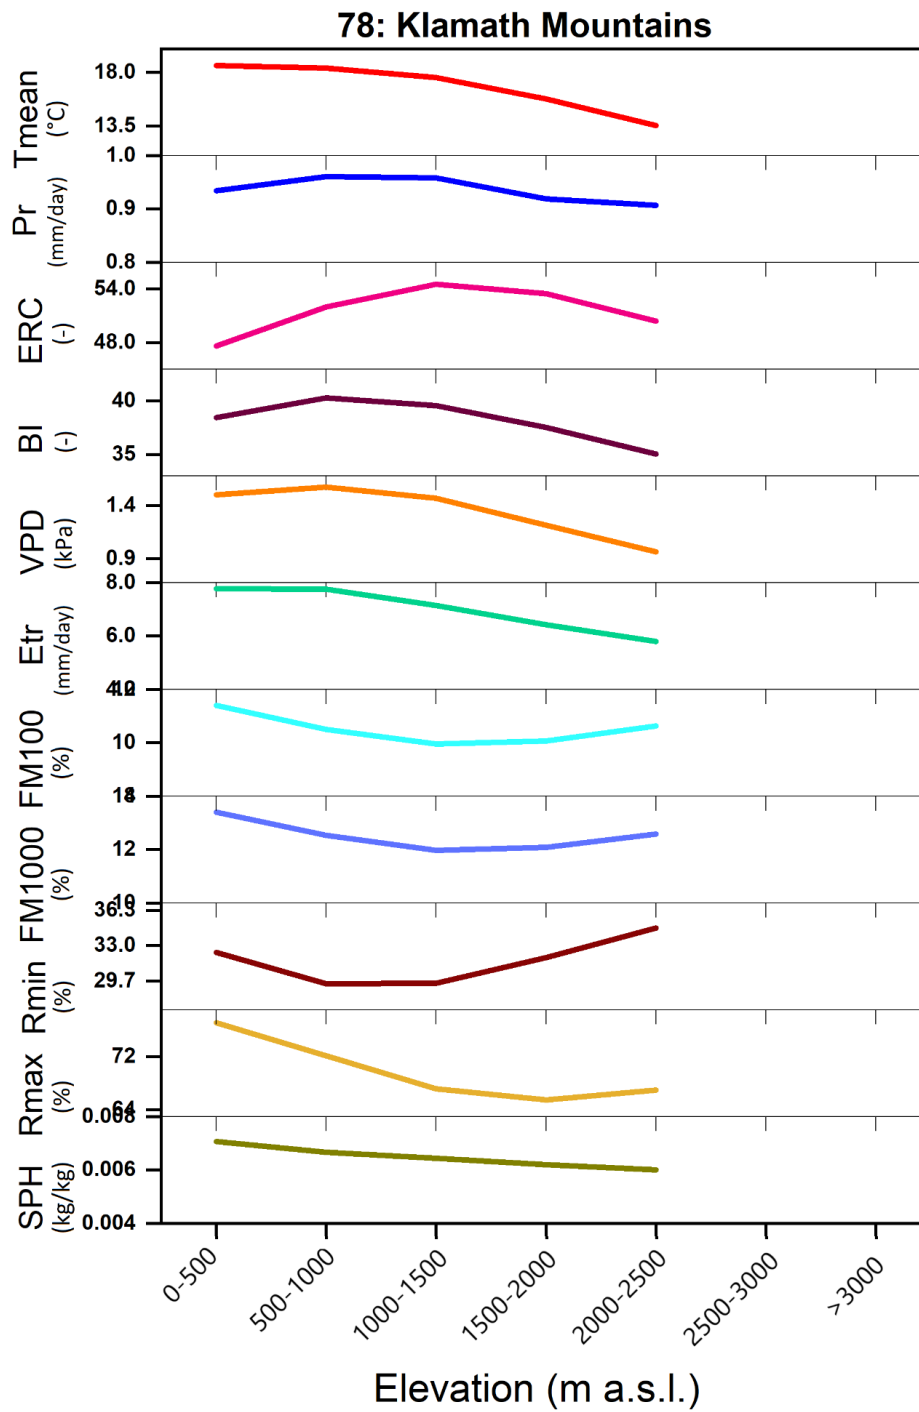

**Figure S29. Elevational changes in climatology of meteorological variables and fire danger indices in ecoregion 78: Klamath Mountains/California High North Coast Range.**

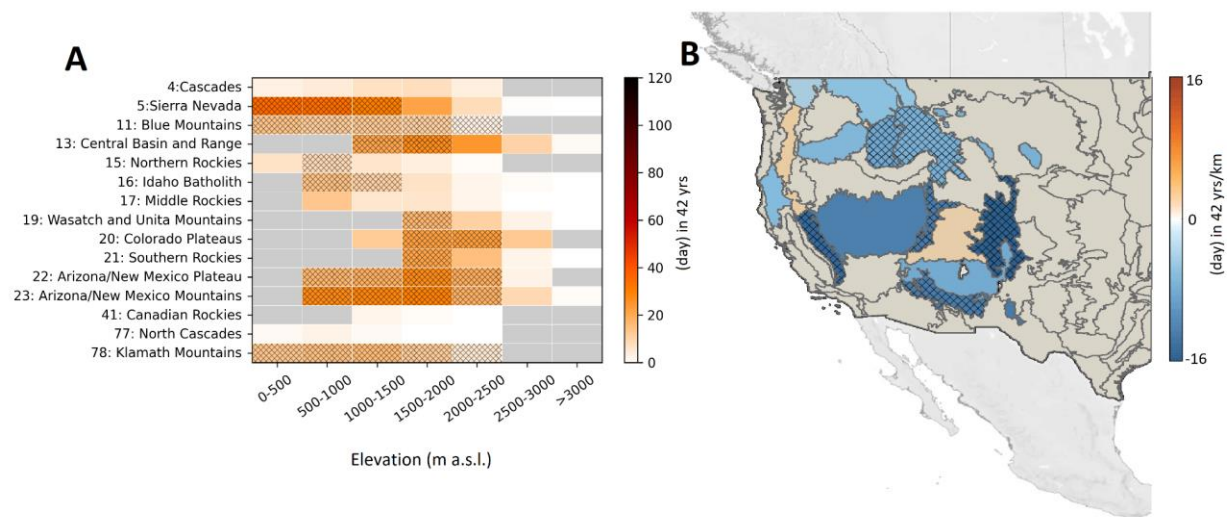

**Figure S30. Elevation-dependent increase of critical fire danger days ( $VPD \geq 2$  kPa).** (A) Temporal trends in critical fire danger days from 1979-2020 in each elevation band and ecoregion. (B) Slope of temporal trends in critical fire danger days across elevation bands. (© OpenStreetMap contributors 2017. Distributed under the Open Data Commons Open Database License (ODbL) v1.0.)<sup>35</sup>.

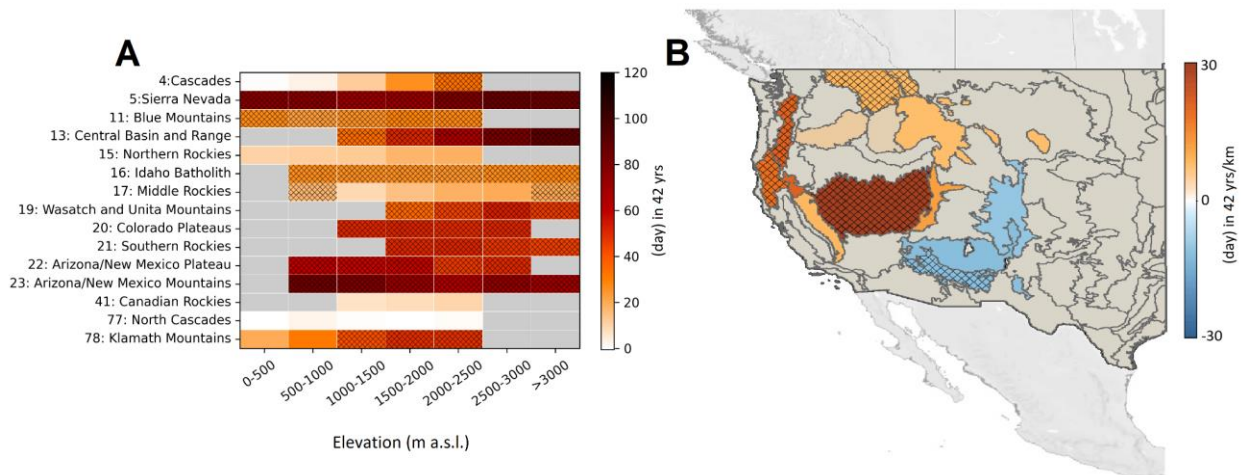

**Figure S31. Elevation-dependent increase of critical fire danger days ( $FM100 \leq 8\%$ ).** (A) Temporal trends in critical fire danger days from 1979-2020 in each elevation band and ecoregion. (B) Slope of temporal trends in critical fire danger days across elevation bands. (© OpenStreetMap contributors 2017. Distributed under the Open Data Commons Open Database License (ODbL) v1.0.)<sup>35</sup>.

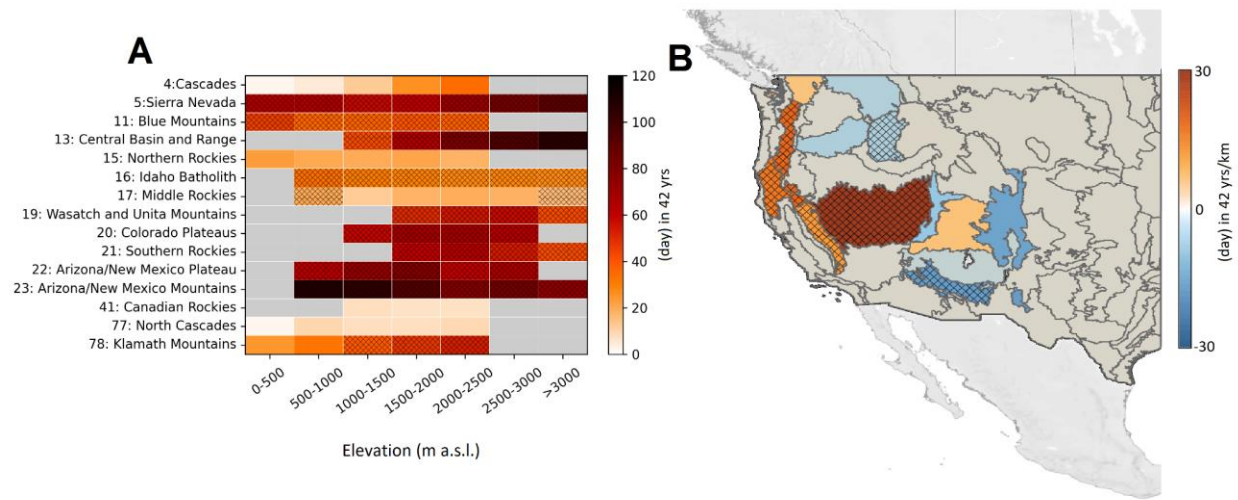

**Figure S32. Elevation-dependent increase of critical fire danger days ( $FM1000 \leq 10\%$ ).** (A) Temporal trends in critical fire danger days from 1979-2020 in each elevation band and ecoregion. (B) Slope of temporal trends in critical fire danger days across elevation bands. (© OpenStreetMap contributors 2017. Distributed under the Open Data Commons Open Database License (ODbL) v1.0.)<sup>35</sup>.

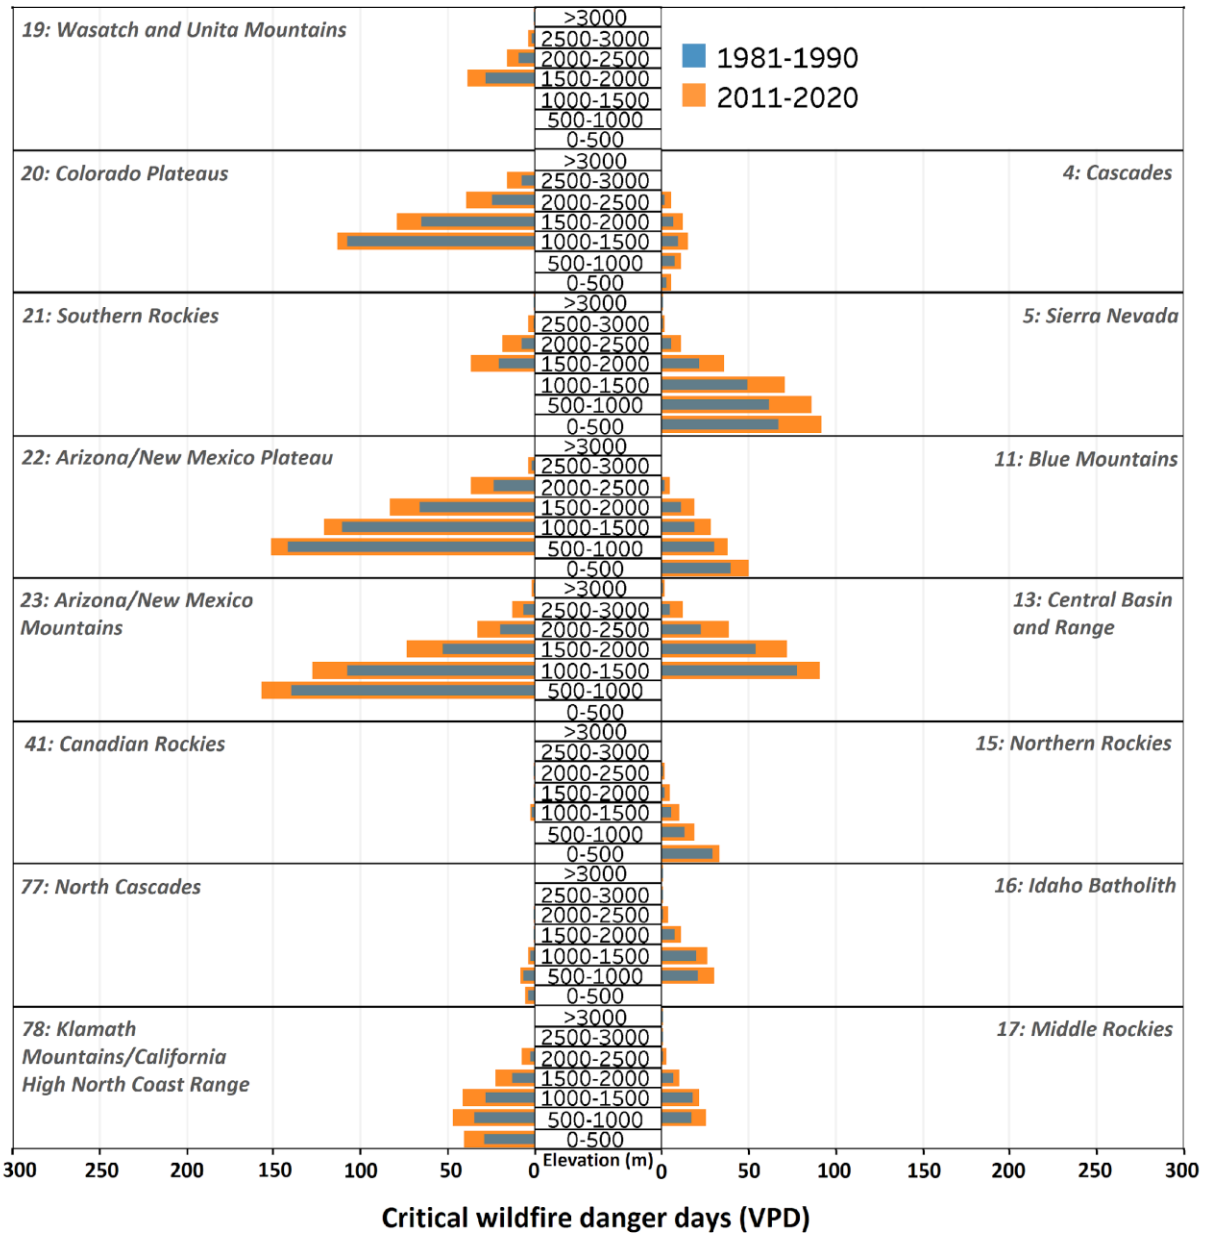

**Figure S33. Annual critical fire danger days based on VPD ( $VPD \geq 2$  kPa) in the first (1981-1990) and last (2011-2020) decades of the study period.**

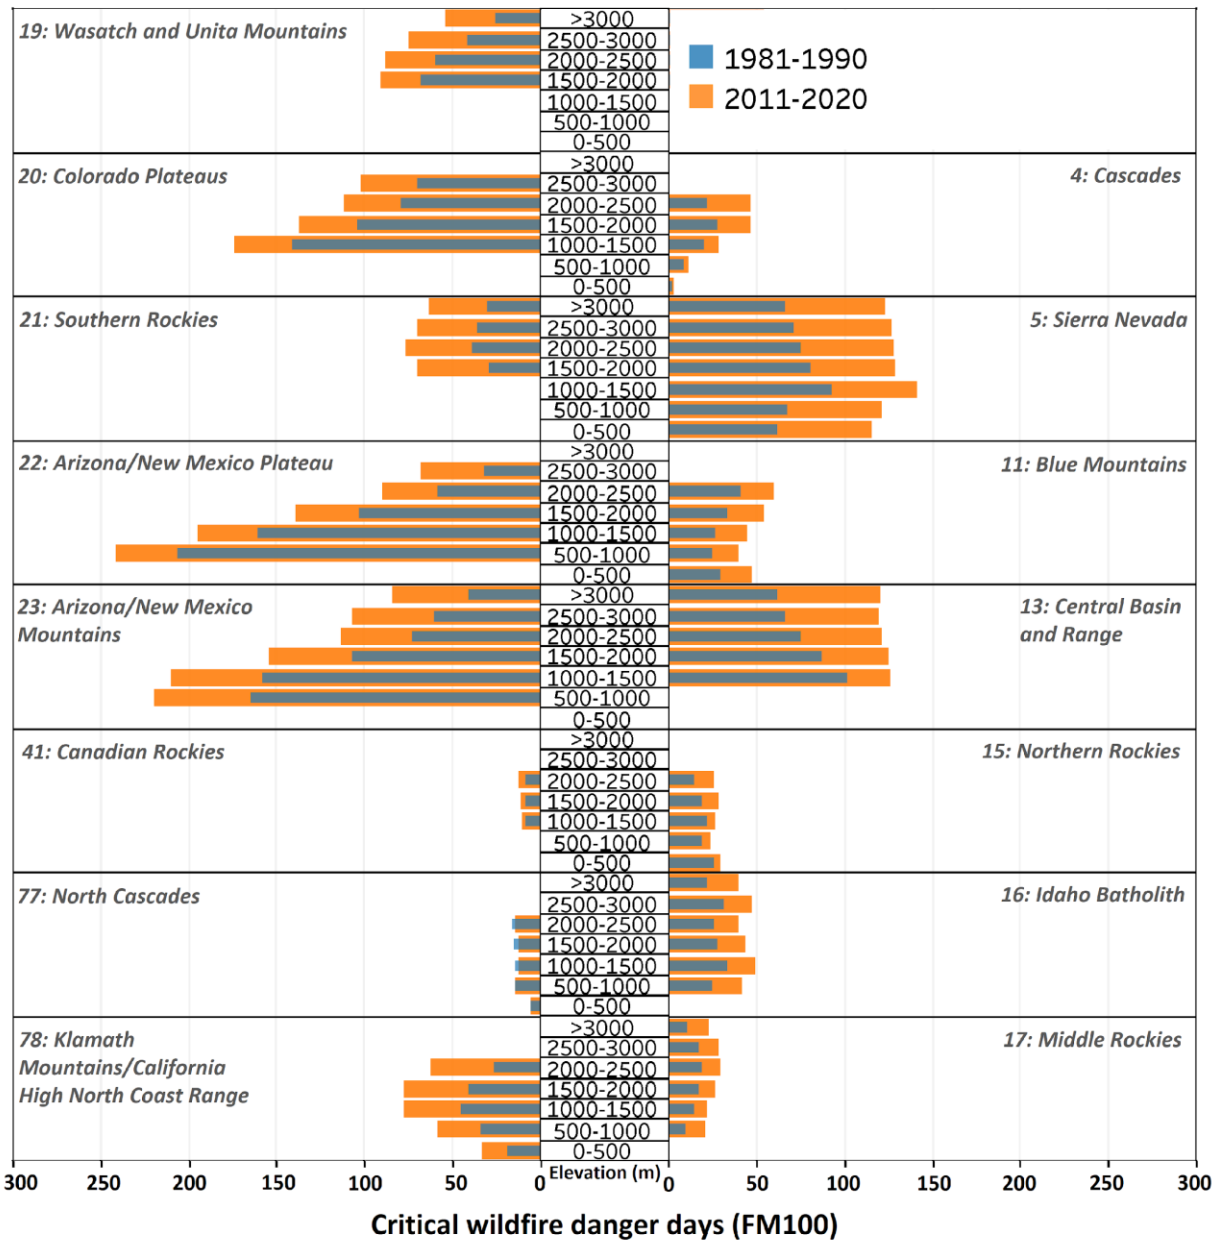

**Figure S34. Annual critical fire danger days based on FM100 ( $FM100 \leq 8\%$ ) in the first (1981-1990) and last (2011-2020) decades of the study period.**

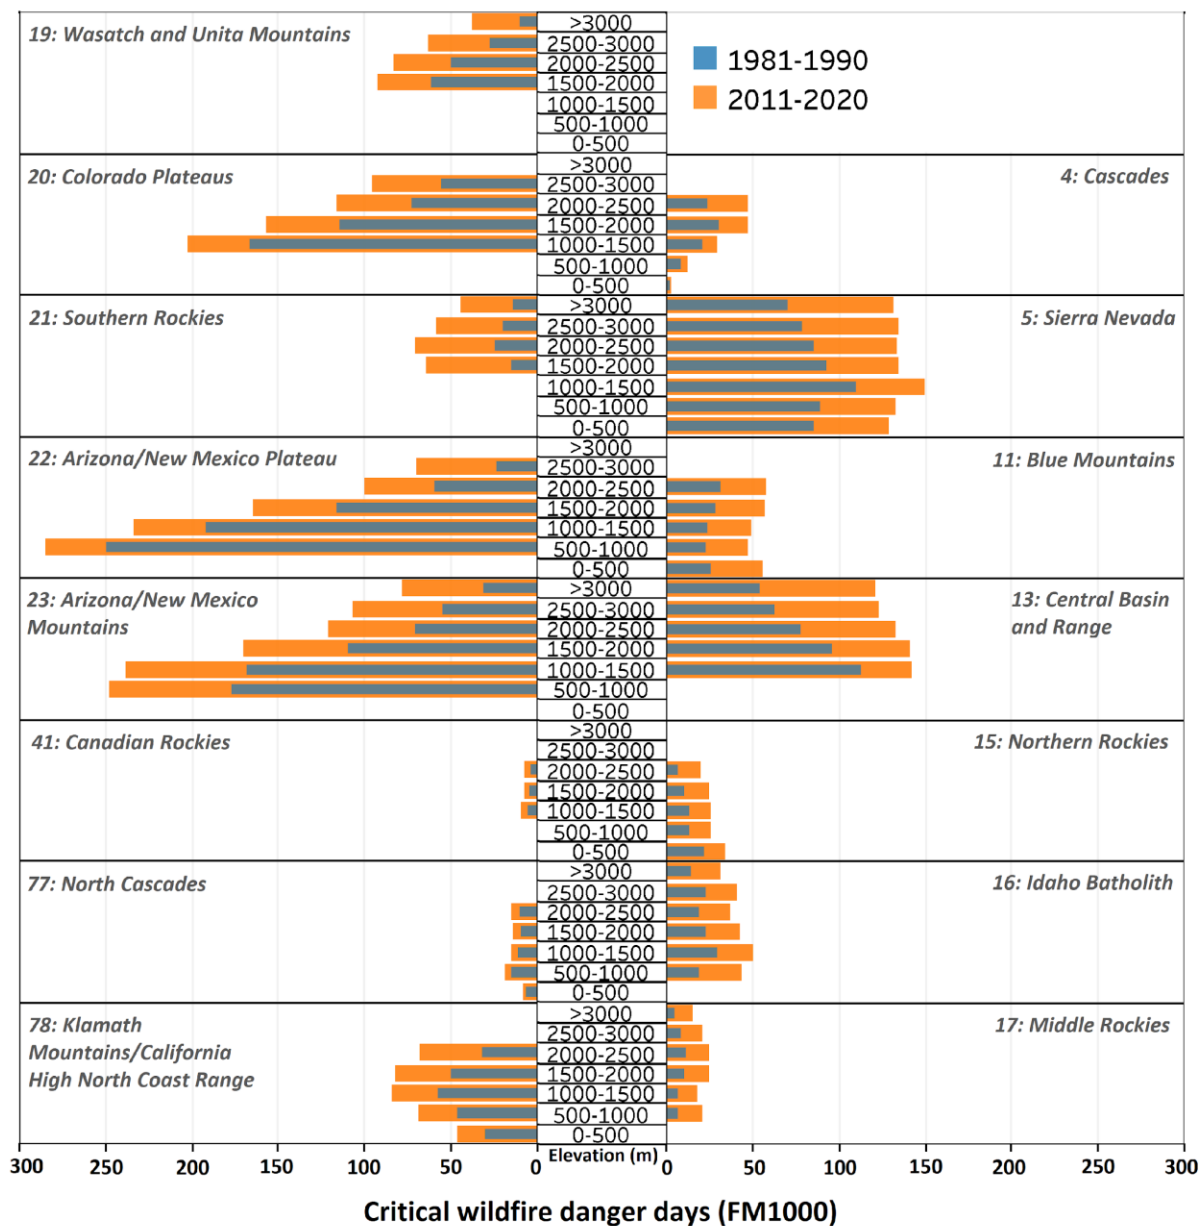

**Figure S35. Annual critical fire danger days based on FM1000 ( $FM1000 \leq 10\%$ ) in the first (1981-1990) and last (2011-2020) decades of the study period.**



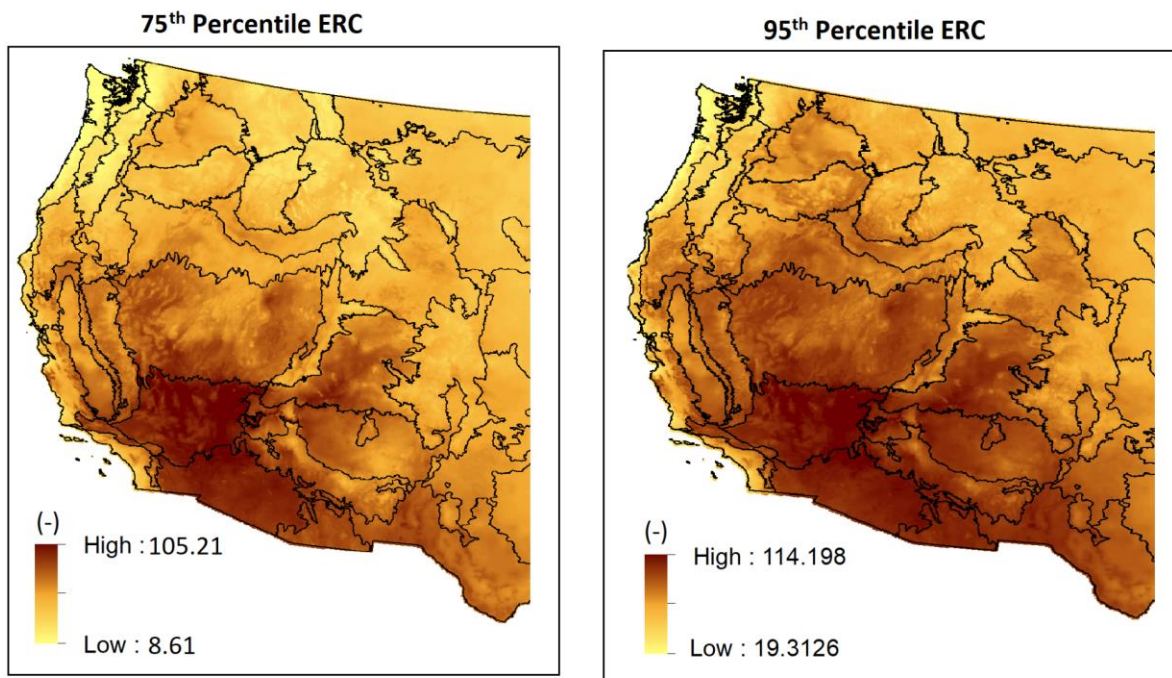

**Figure S36.** ERC threshold associated with the 75th and 95th percentiles, respectively, of daily ERC values from 1979-2020.

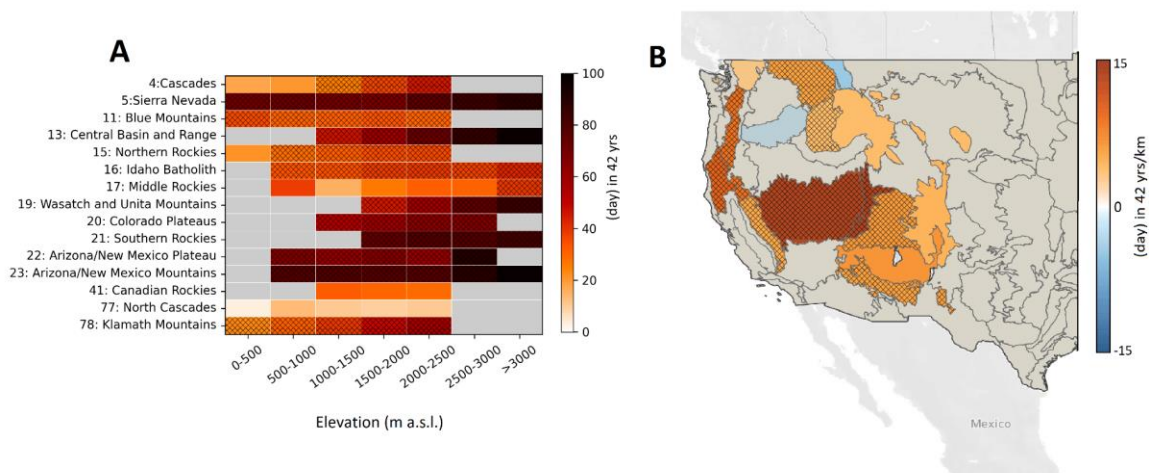

**Figure S37.** Elevation-dependent increase in high fire danger days. **(A)** Temporal trends in high fire danger days – associated with daily ERC larger than the 75th percentile of long-term record from 1979-2020 – in each elevation band and ecoregion. **(B)** Slope of temporal trends in high fire danger days across elevation bands. Hatched areas indicate statistically significant trends at the 95% confidence level. (© OpenStreetMap contributors 2017. Distributed under the Open Data Commons Open Database License (ODbL) v1.0.)<sup>35</sup>.



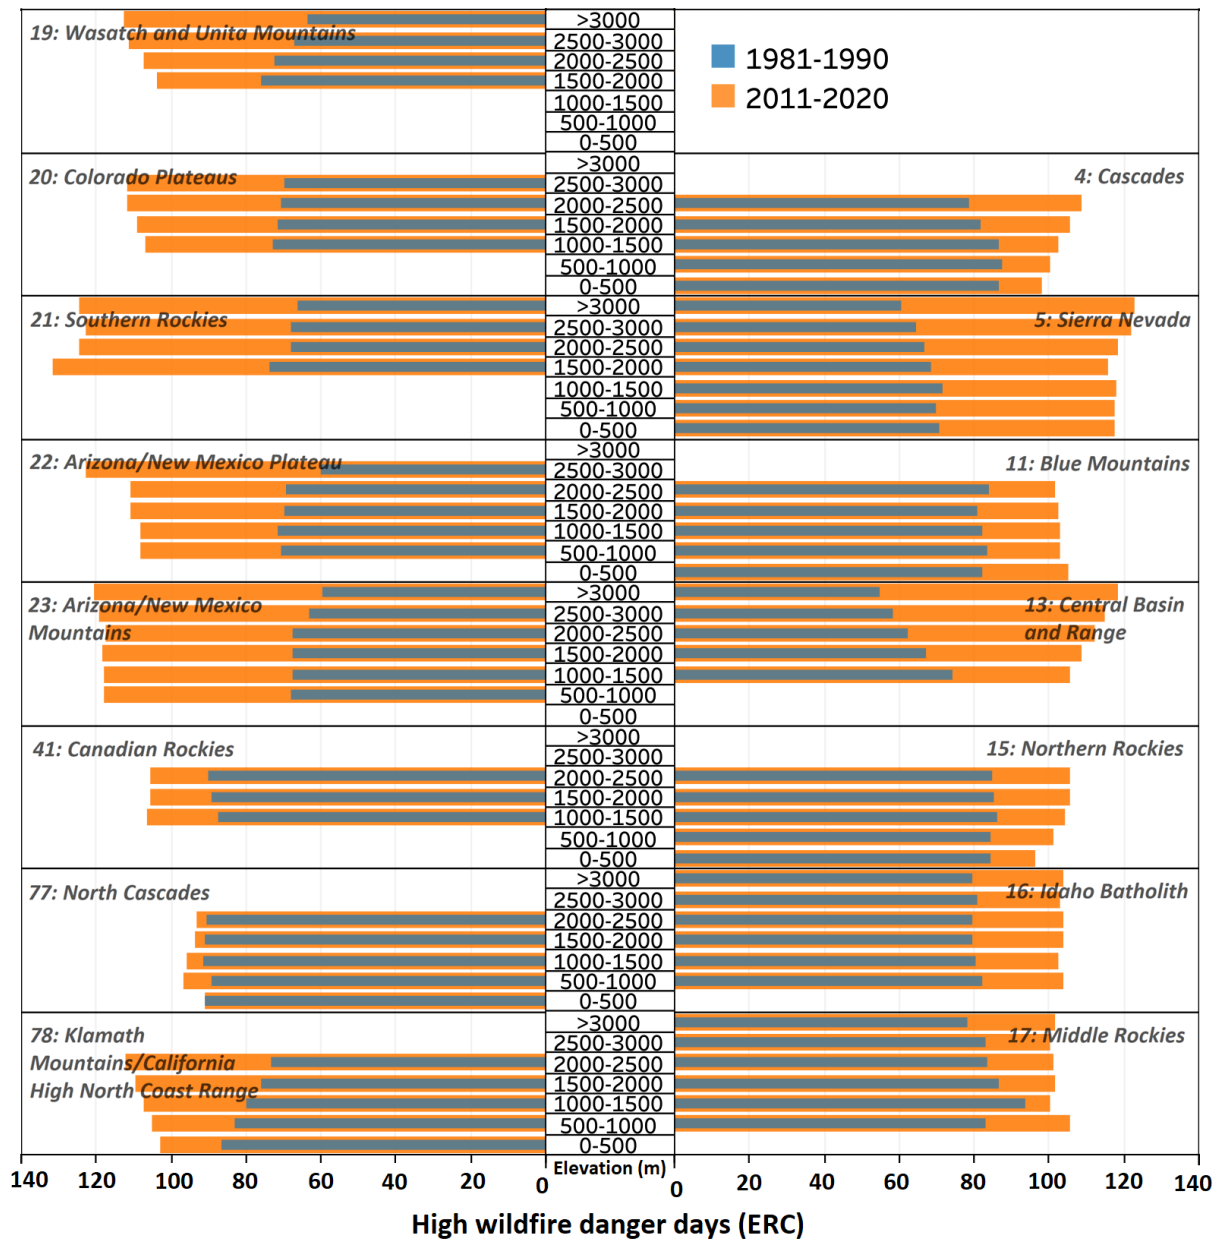

**Figure S38. Annual high fire danger days associated with daily ERC larger than the 75th percentile of long-term record from 1979-2020. Decadal average high fire danger days per year from 1981-1990 (blue) and 2011-2020 (orange).**

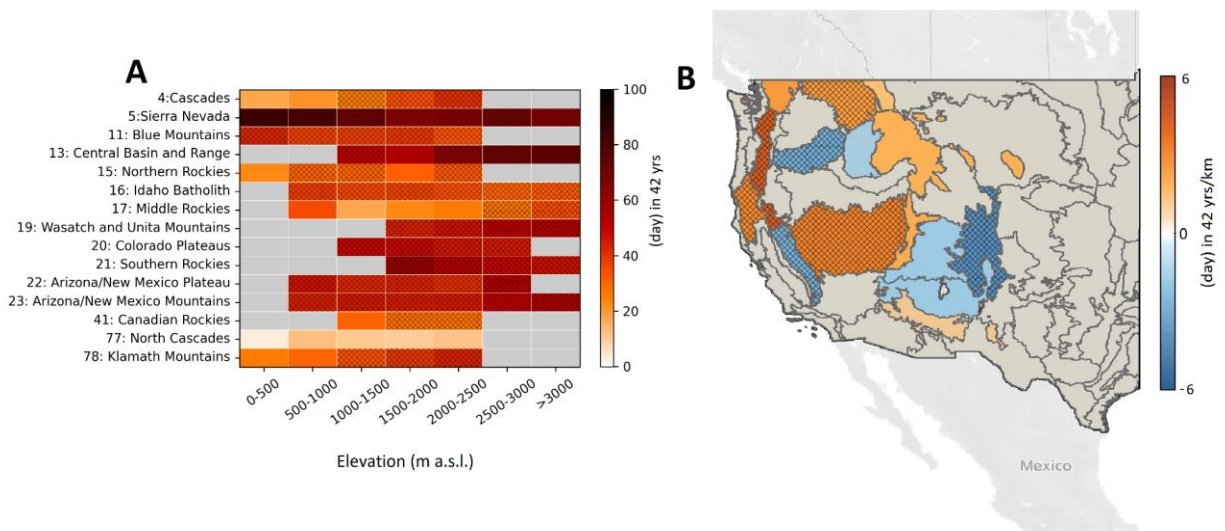

**Figure S39. Elevation-dependent increase in extreme fire danger days. (A)** Temporal trends in extreme fire danger days – associated with daily ERC larger than the 95th percentile of long-term record from 1979-2020 – in each elevation band and ecoregion. **(B)** Slope of temporal trends in extreme fire danger days across elevation bands. Hatched areas indicate statistically significant trends at the 95% confidence level. (© OpenStreetMap contributors 2017. Distributed under the Open Data Commons Open Database License (ODbL) v1.0.)<sup>35</sup>.

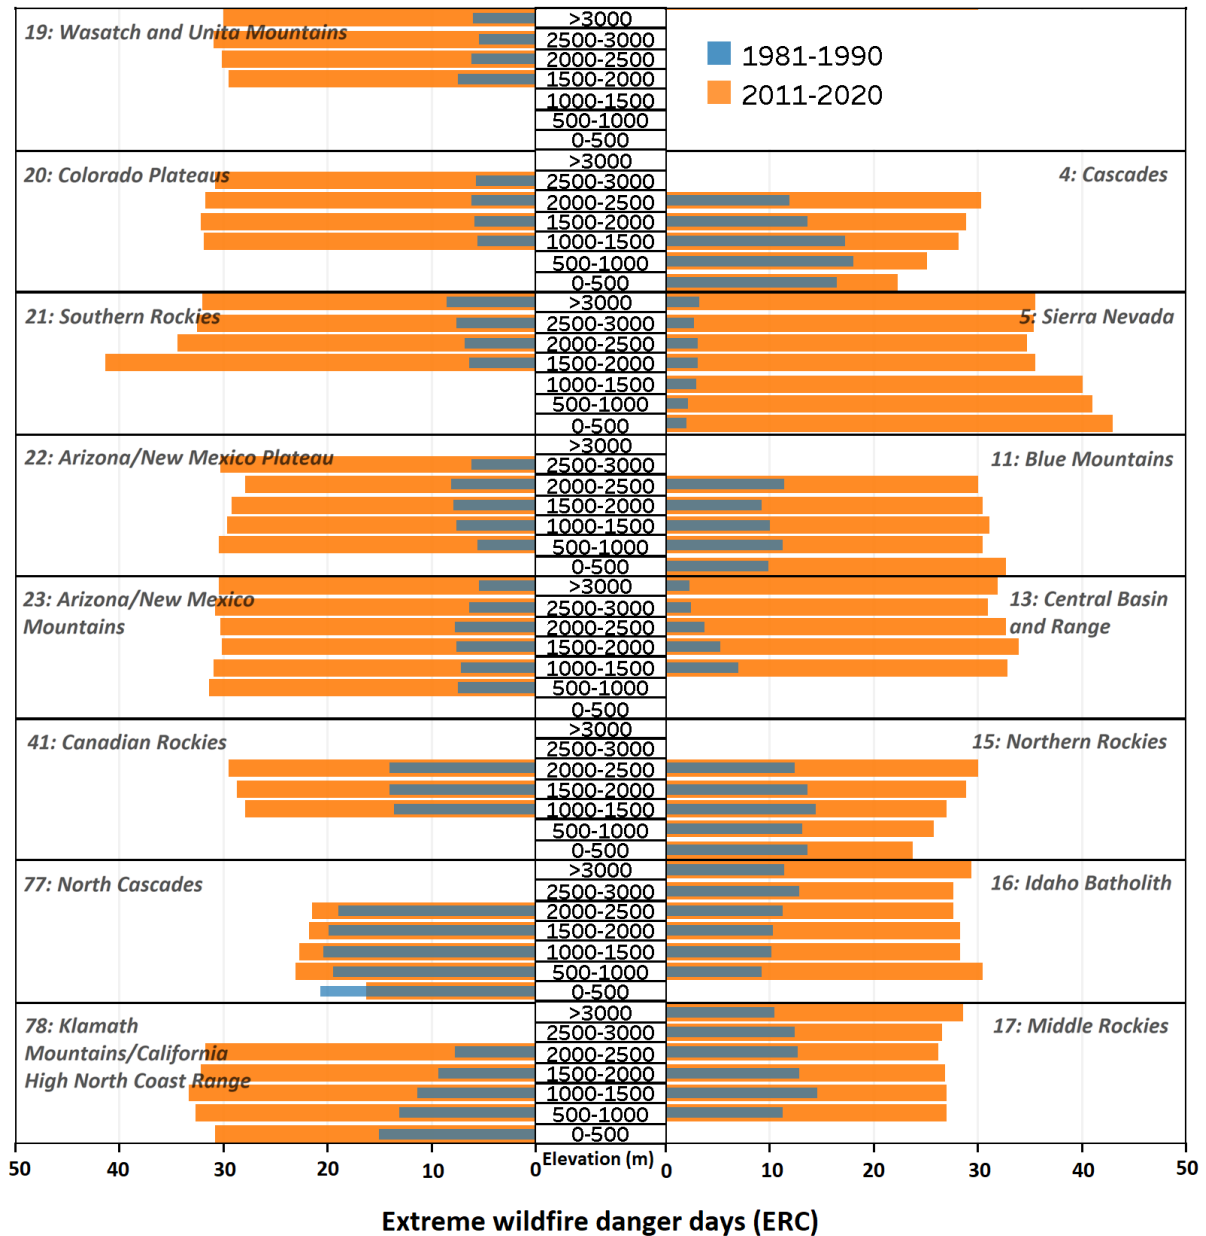

**Figure S40. Annual extreme fire danger days associated with daily ERC larger than the 95th percentile of long-term record from 1979-2020. Decadal average extreme fire danger days per year from 1981-1990 (blue) and 2011-2020 (orange).**

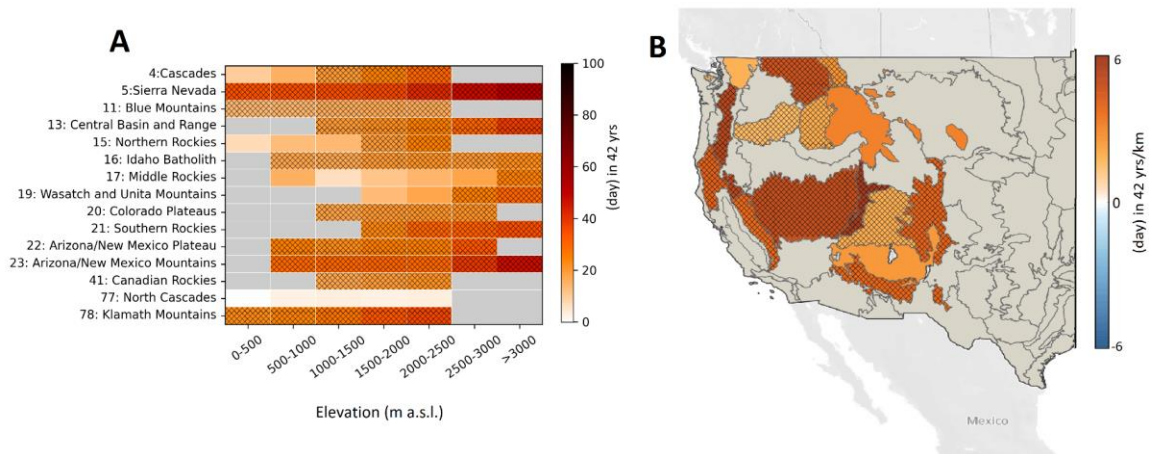

**Figure S41. Elevation-dependent increase in high fire danger days. (A)** Temporal trends in high fire danger days – associated with daily VPD larger than the 75th percentile of long-term record from 1979-2020 – in each elevation band and ecoregion. **(B)** Slope of temporal trends in high fire danger days across elevation bands. Hatched areas indicate statistically significant trends at the 95% confidence level. (© OpenStreetMap contributors 2017. Distributed under the Open Data Commons Open Database License (ODbL) v1.0.)<sup>35</sup>.

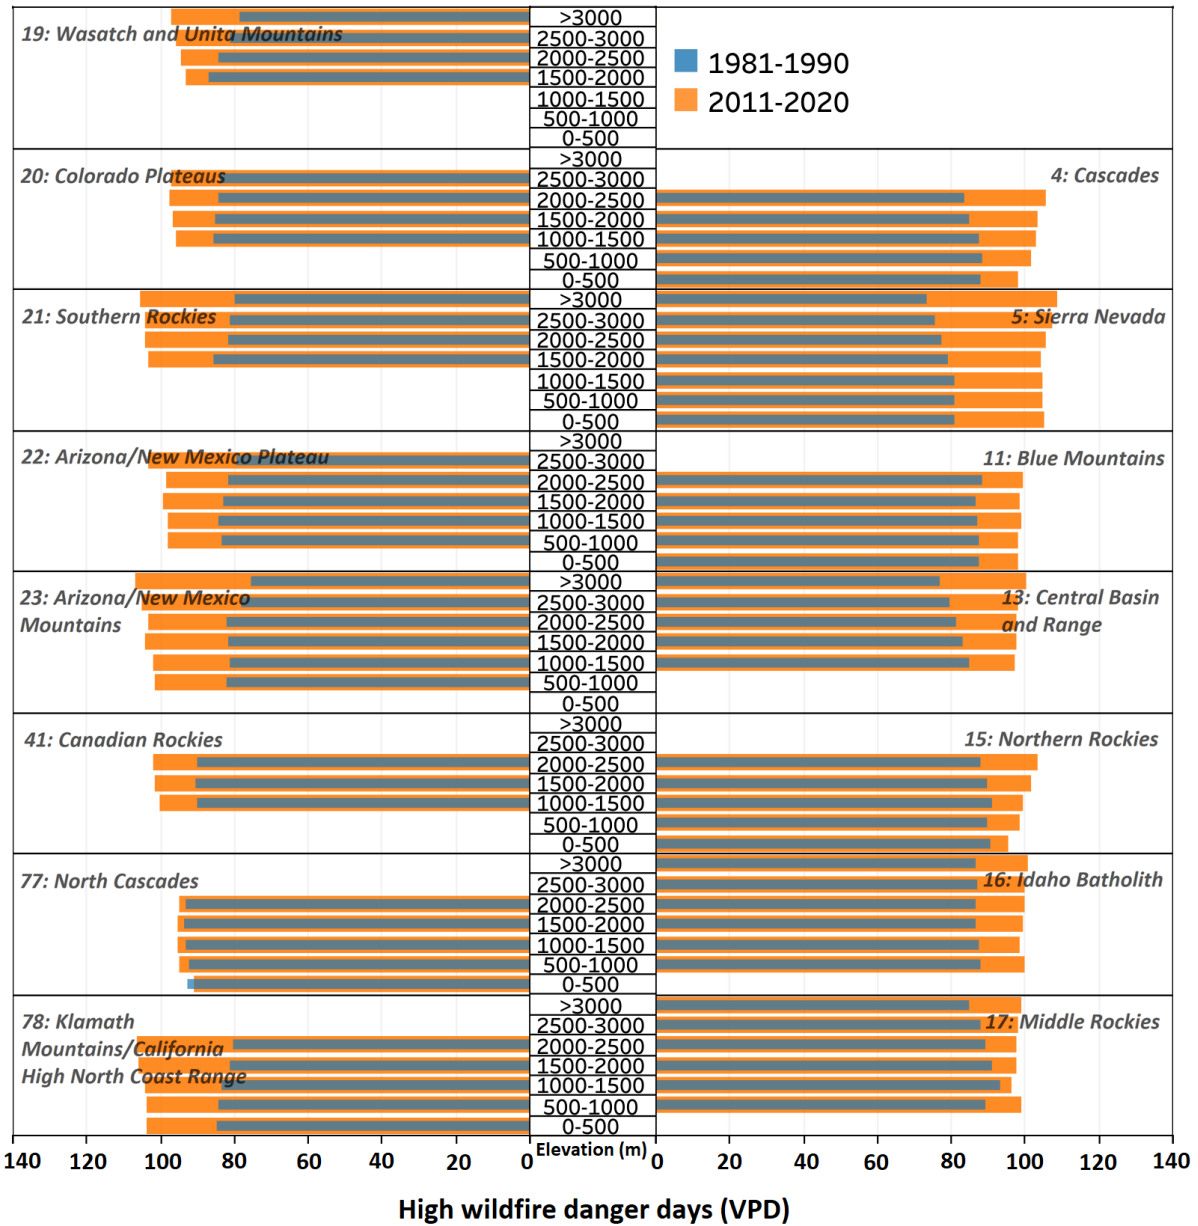

**Figure S42. Annual high fire danger days associated with daily VPD larger than the 75th percentile of long-term record from 1979-2020. Decadal average high fire danger days per year from 1981-1990 (blue) and 2011-2020 (orange).**

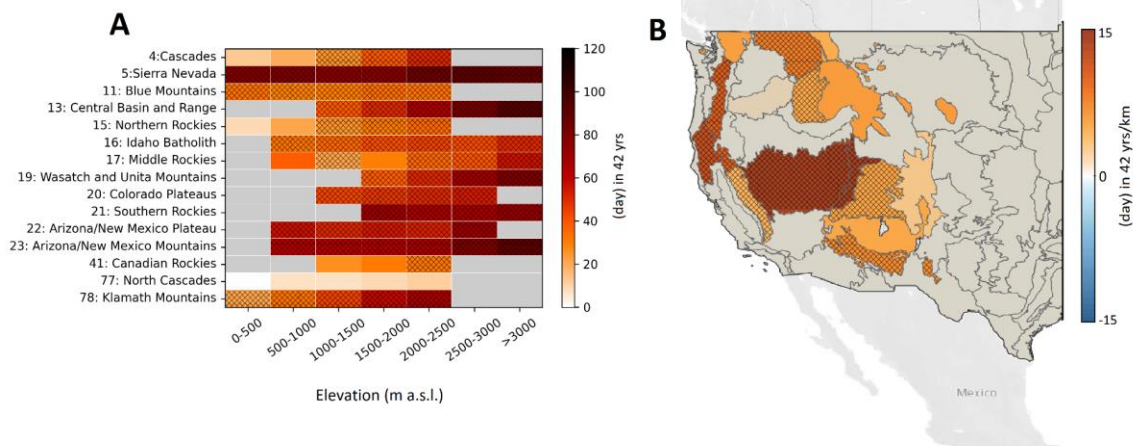

**Figure S43. Elevation-dependent increase in high fire danger days. (A)** Temporal trends in high fire danger days – associated with daily FM100 smaller than the 25th percentile of long-term record from 1979–2020 – in each elevation band and ecoregion. **(B)** Slope of temporal trends in high fire danger days across elevation bands. Hatched areas indicate statistically significant trends at the 95% confidence level. (© OpenStreetMap contributors 2017. Distributed under the Open Data Commons Open Database License (ODbL) v1.0.)<sup>35</sup>.

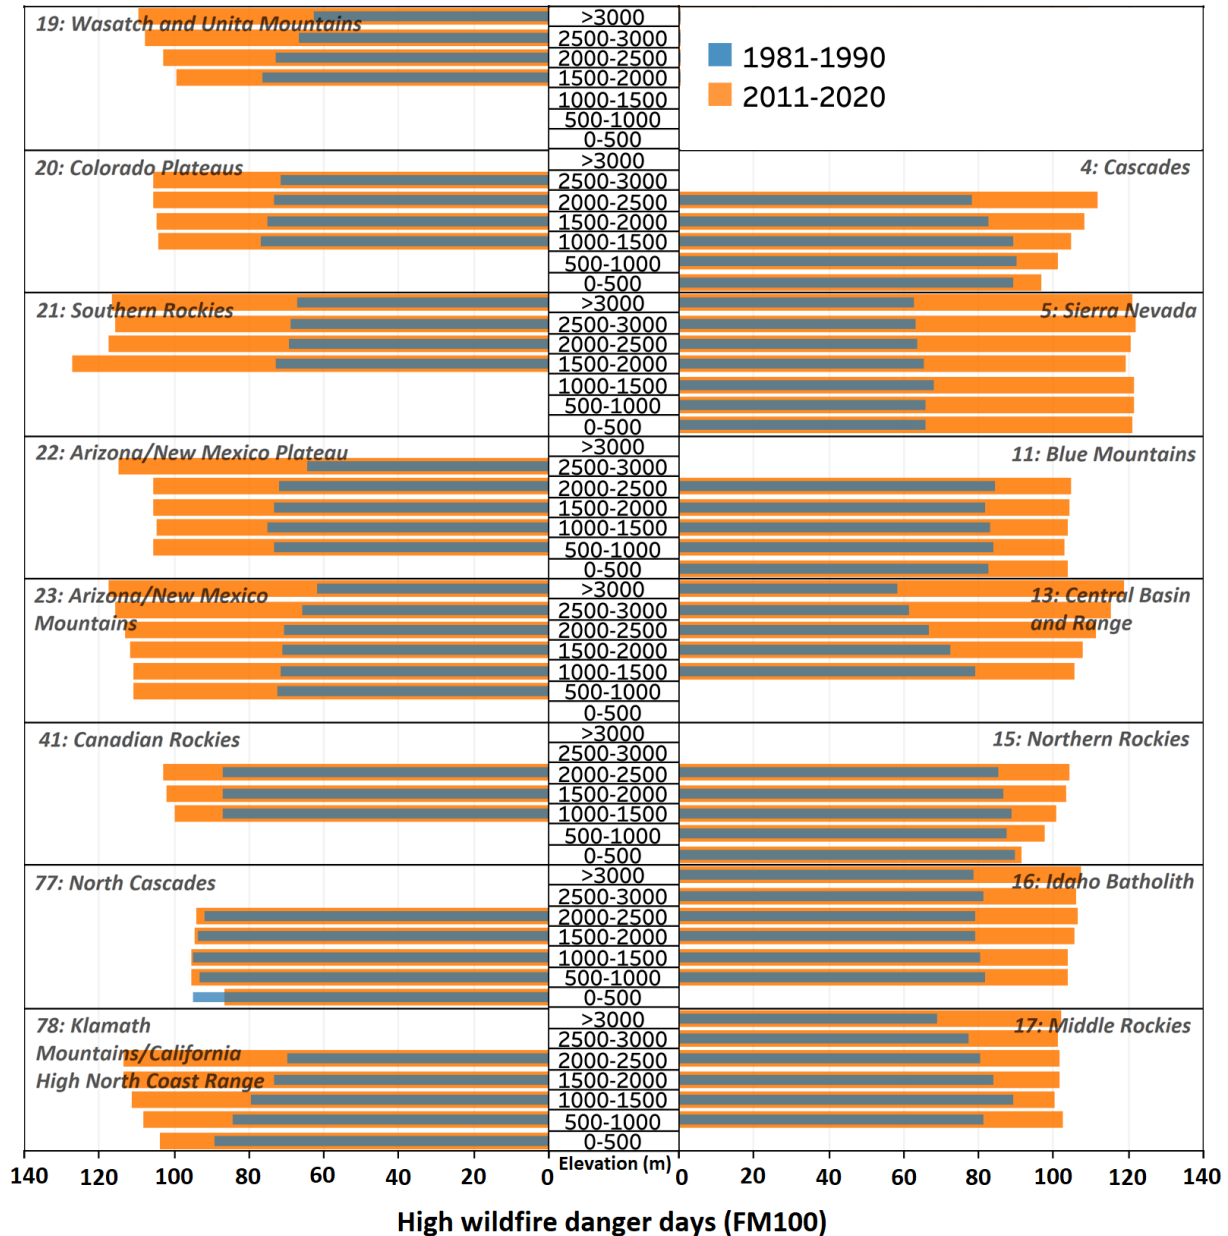

**Figure S44. Annual high fire danger days associated with daily FM100 smaller than the 25th percentile of long-term record from 1979-2020. Decadal average high fire danger days per year from 1981-1990 (blue) and 2011-2020 (orange).**



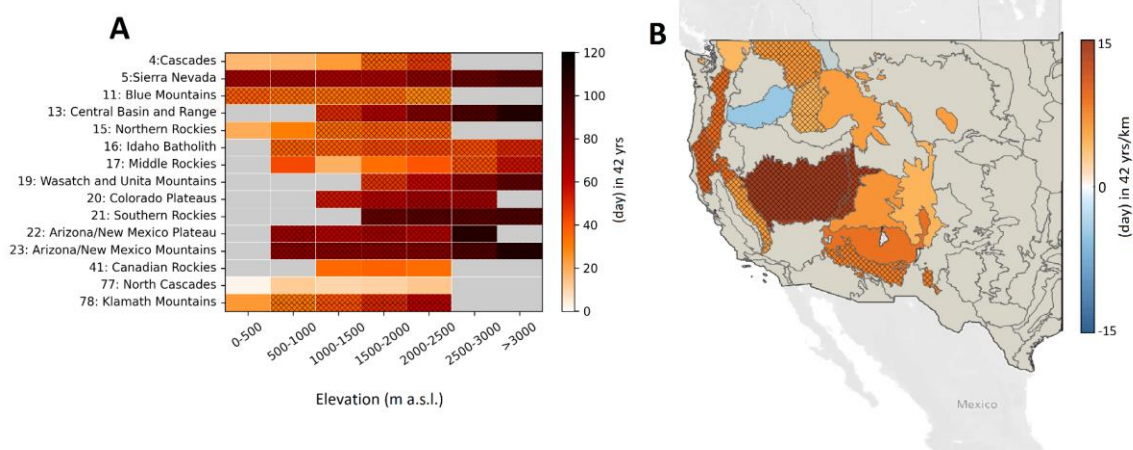

**Figure S45. Elevation-dependent increase in high fire danger days. (A)** Temporal trends in high fire danger days – associated with daily FM1000 smaller than the 25th percentile of long-term record from 1979–2020 – in each elevation band and ecoregion. **(B)** Slope of temporal trends in high fire danger days across elevation bands. Hatched areas indicate statistically significant trends at the 95% confidence level. (© OpenStreetMap contributors 2017. Distributed under the Open Data Commons Open Database License (ODbL) v1.0.)<sup>35</sup>.



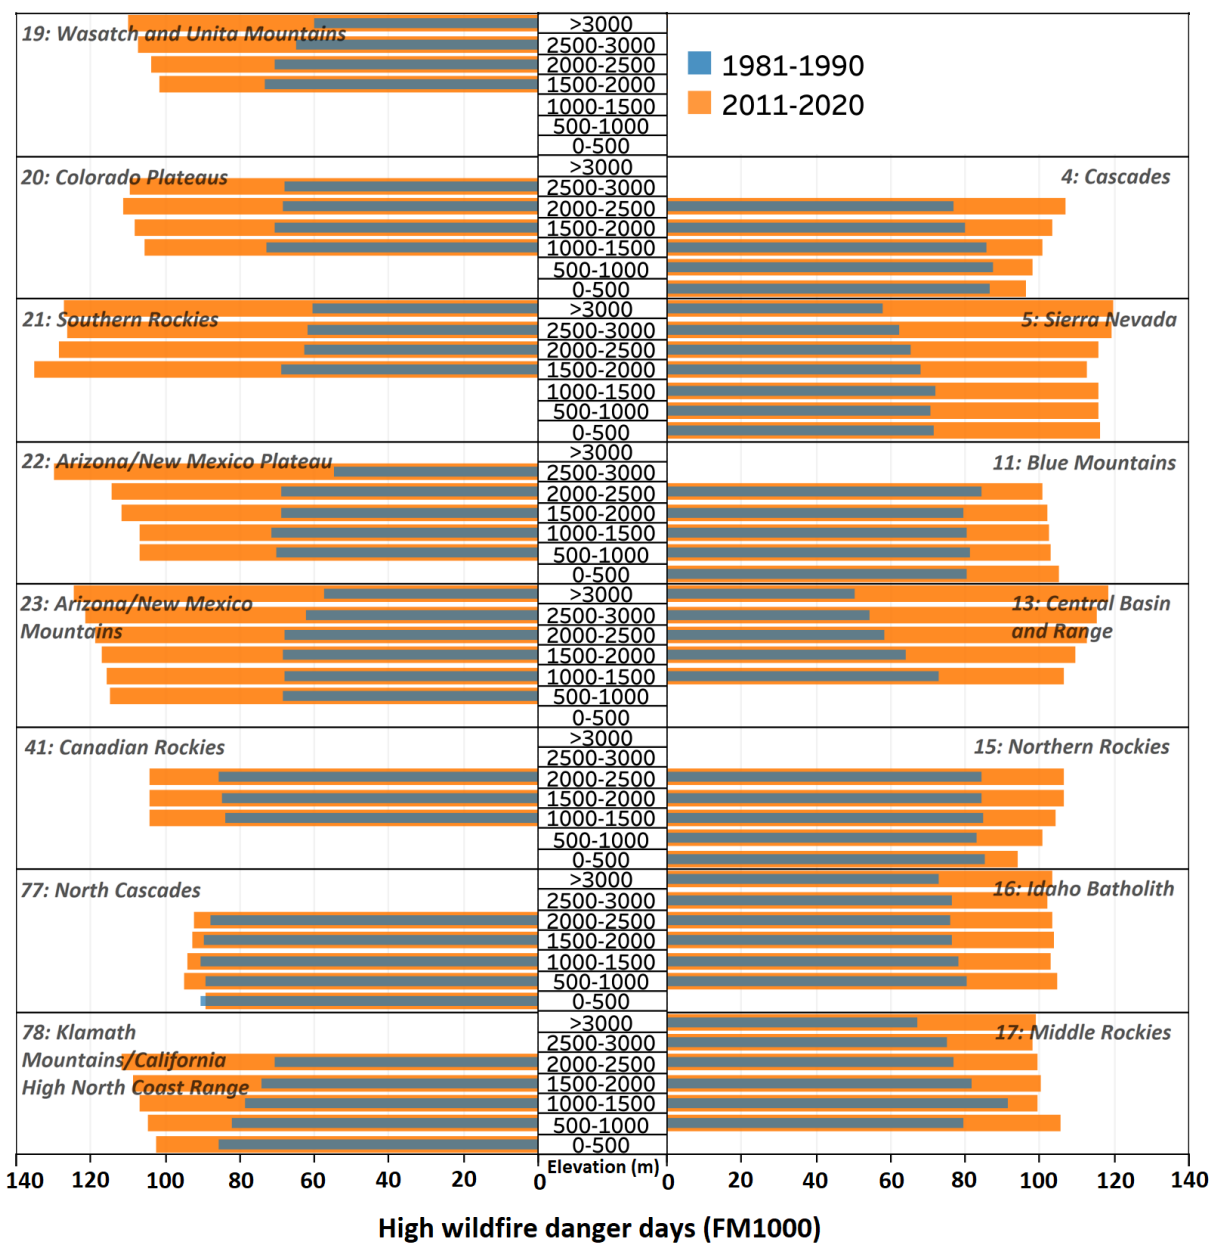

**Figure S46. Annual high fire danger days associated with daily FM1000 smaller than the 25th percentile of long-term record from 1979-2020. Decadal average high fire danger days per year from 1981-1990 (blue) and 2011-2020 (orange).**

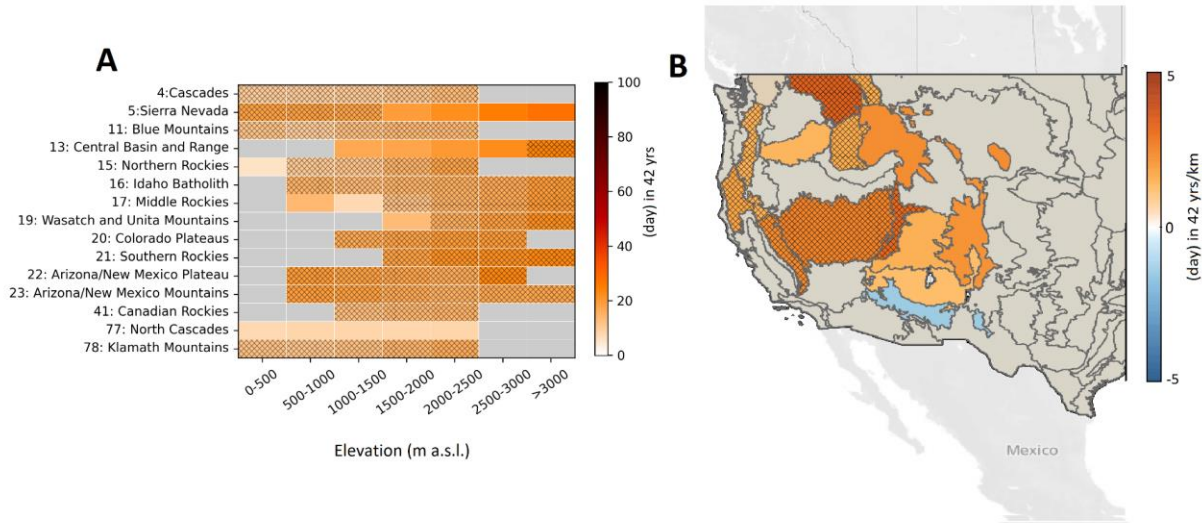

**Figure S47. Elevation-dependent increase in extreme fire danger days. (A)** Temporal trends in extreme fire danger days – associated with daily VPD larger than the 95th percentile of long-term record from 1979-2020 – in each elevation band and ecoregion. **(B)** Slope of temporal trends in extreme fire danger days across elevation bands. Hatched areas indicate statistically significant trends at the 95% confidence level. (© OpenStreetMap contributors 2017. Distributed under the Open Data Commons Open Database License (ODbL) v1.0.)<sup>35</sup>.

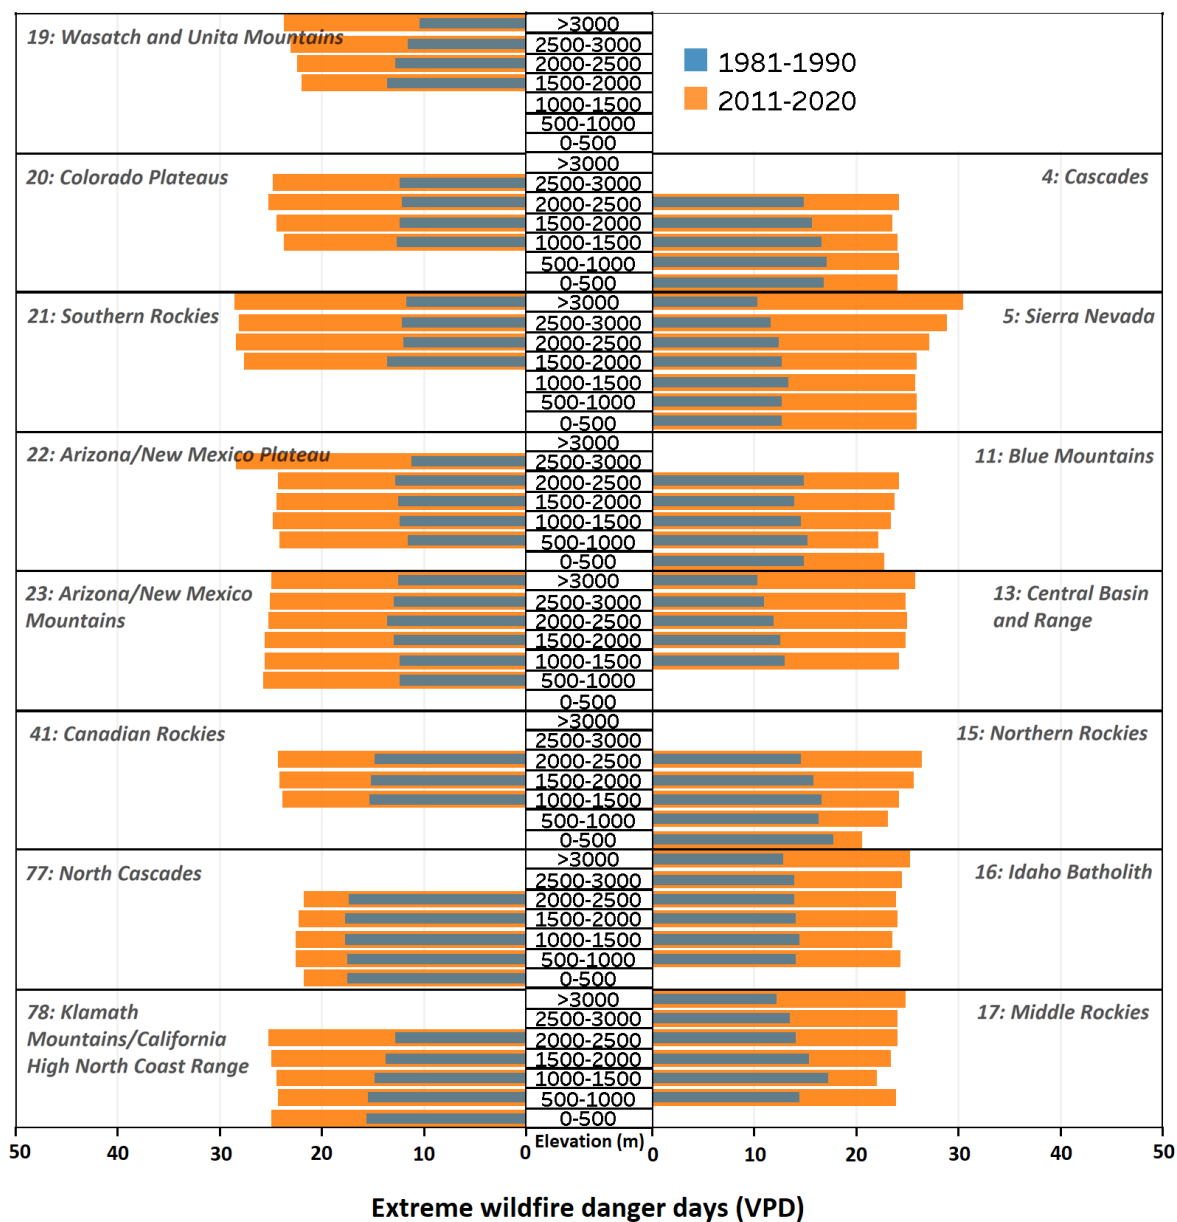

**Figure S48. Annual extreme fire danger days associated with daily VPD larger than the 95th percentile of long-term record from 1979-2020. Decadal average extreme fire danger days per year from 1981-1990 (blue) and 2011-2020 (orange).**

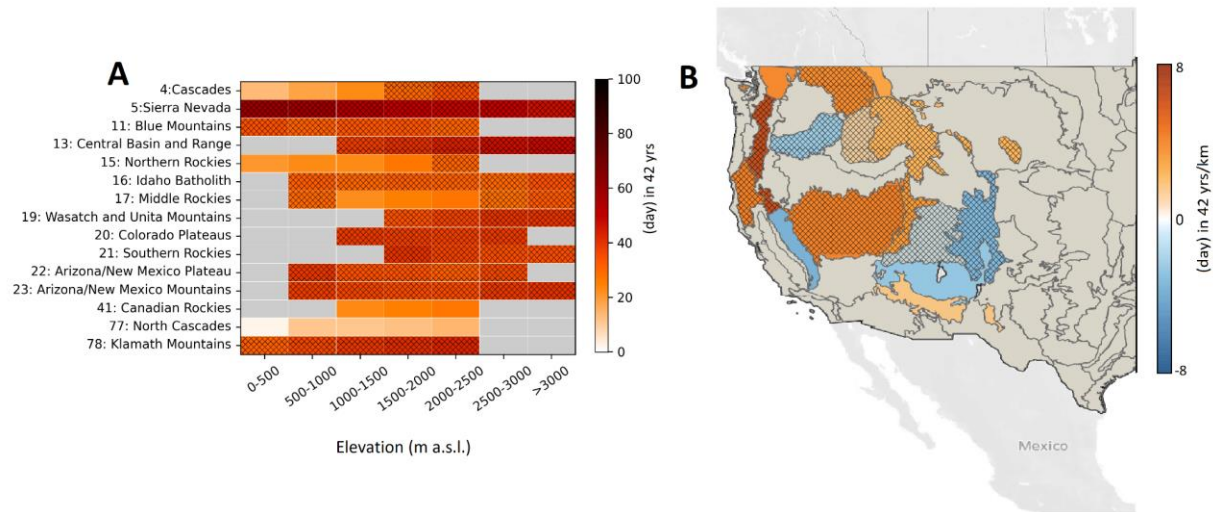

**Figure S49. Elevation-dependent increase in extreme fire danger days. (A)** Temporal trends in extreme fire danger days – associated with daily FM100 smaller than the 5th percentile of long-term record from 1979-2020 – in each elevation band and ecoregion. **(B)** Slope of temporal trends in extreme fire danger days across elevation bands. Hatched areas indicate statistically significant trends at the 95% confidence level. (© OpenStreetMap contributors 2017. Distributed under the Open Data Commons Open Database License (ODbL) v1.0.)<sup>35</sup>.

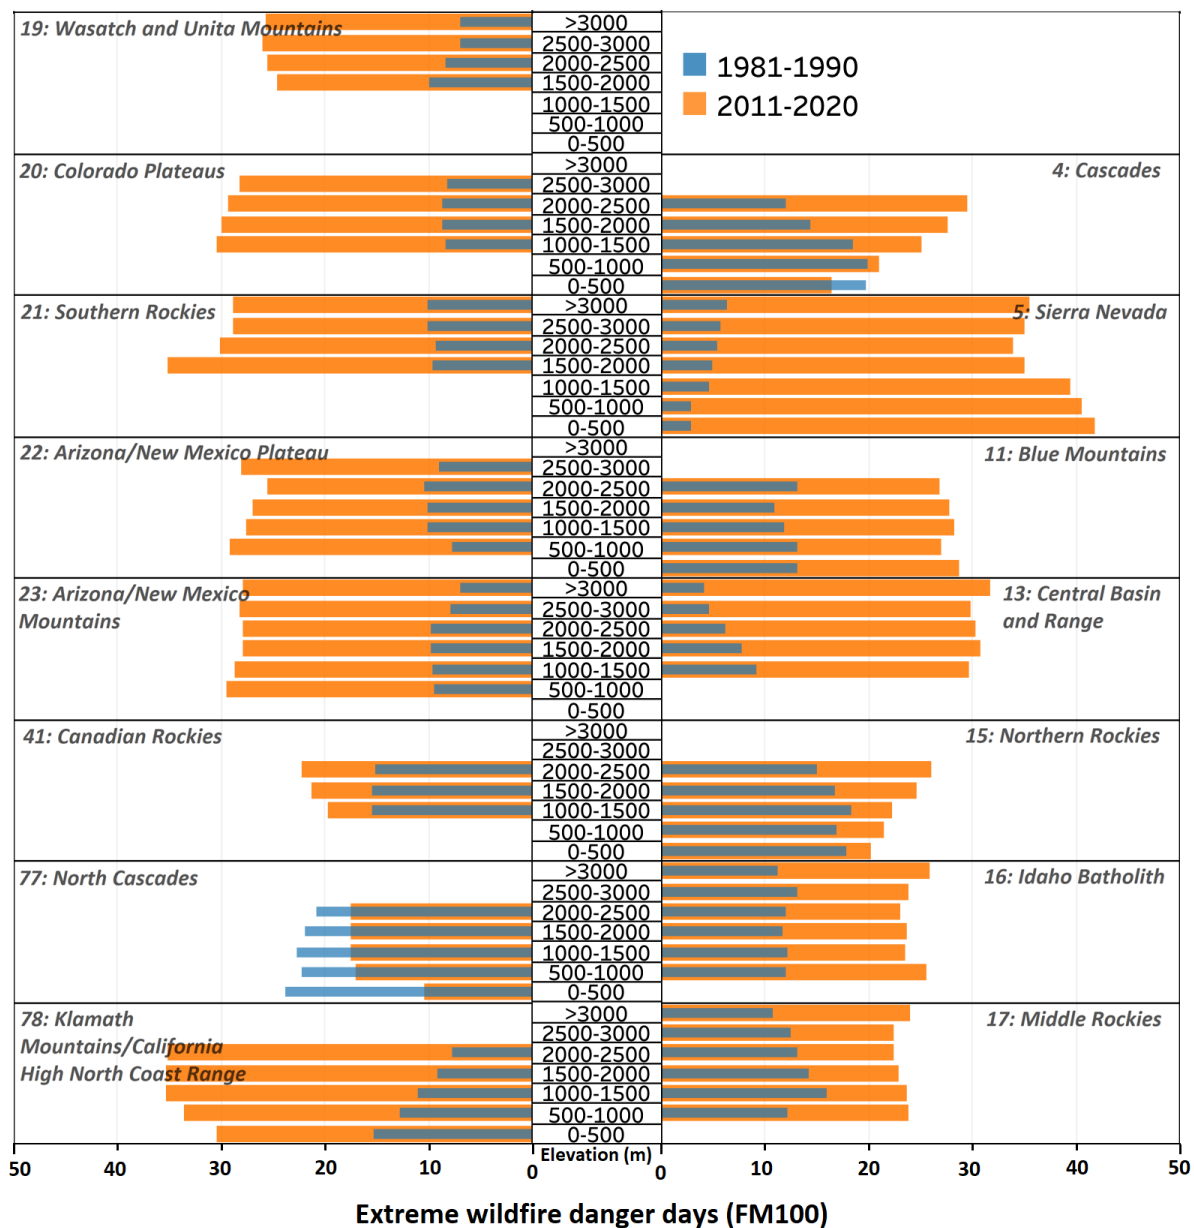

**Figure S50. Annual extreme fire danger days associated with daily FM100 smaller than the 5th percentile of long-term record from 1979-2020. Decadal average extreme fire danger days per year from 1981-1990 (blue) and 2011-2020 (orange).**

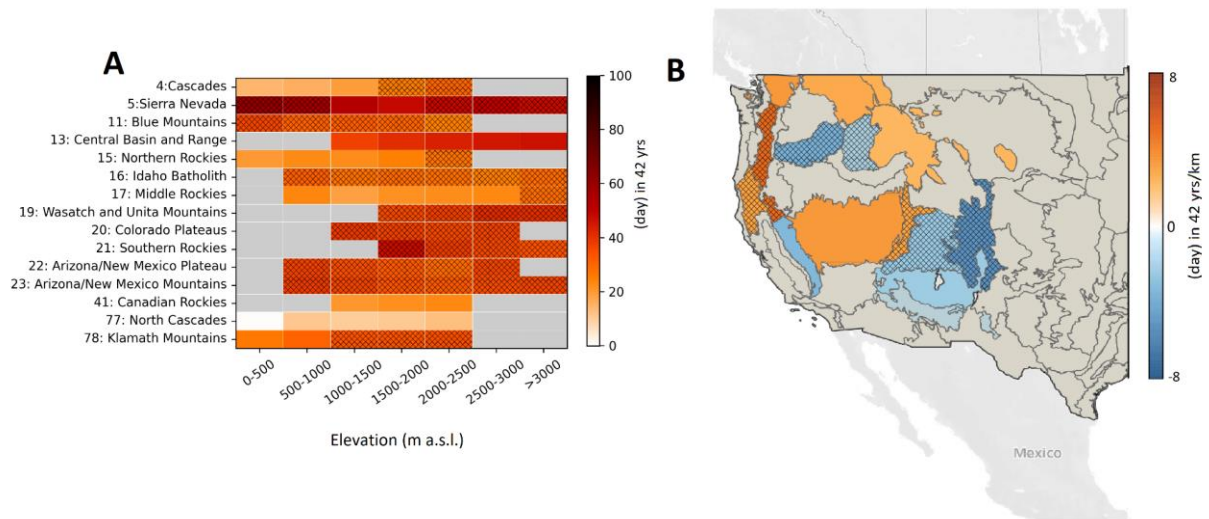

**Figure S51. Elevation-dependent increase in extreme fire danger days. (A)** Temporal trends in extreme fire danger days – associated with daily FM1000 smaller than the 5th percentile of long-term record from 1979-2020 – in each elevation band and ecoregion. **(B)** Slope of temporal trends in extreme fire danger days across elevation bands. Hatched areas indicate statistically significant trends at the 95% confidence level. (© OpenStreetMap contributors 2017. Distributed under the Open Data Commons Open Database License (ODbL) v1.0.)<sup>35</sup>.

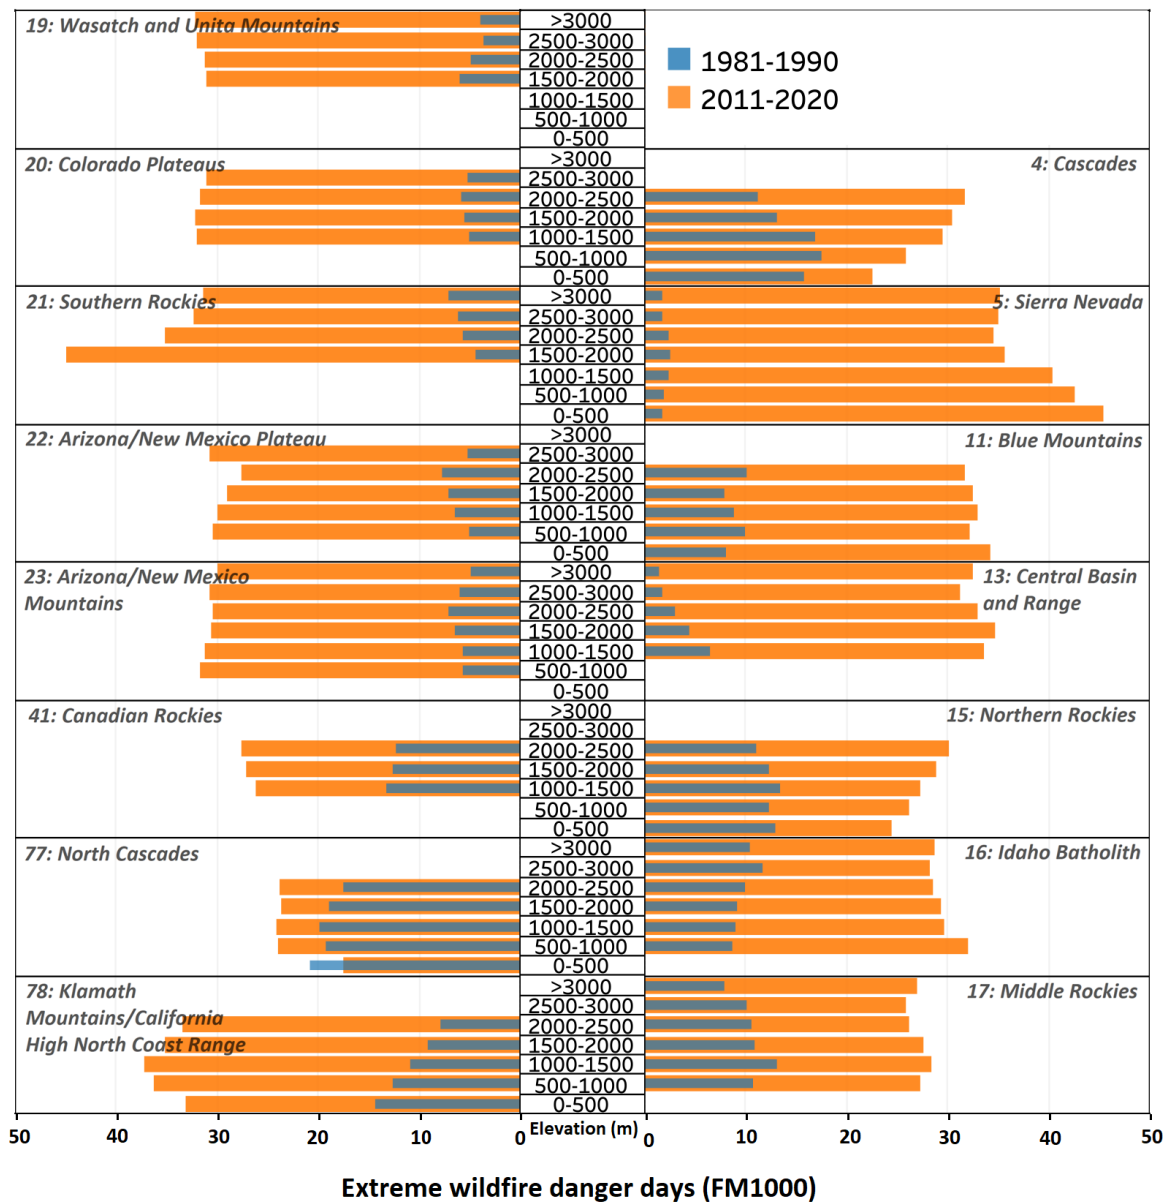

**Figure S52. Annual extreme fire danger days associated with daily FM1000 smaller than the 5th percentile of long-term record from 1979-2020. Decadal average extreme fire danger days per year from 1981-1990 (blue) and 2011-2020 (orange).**

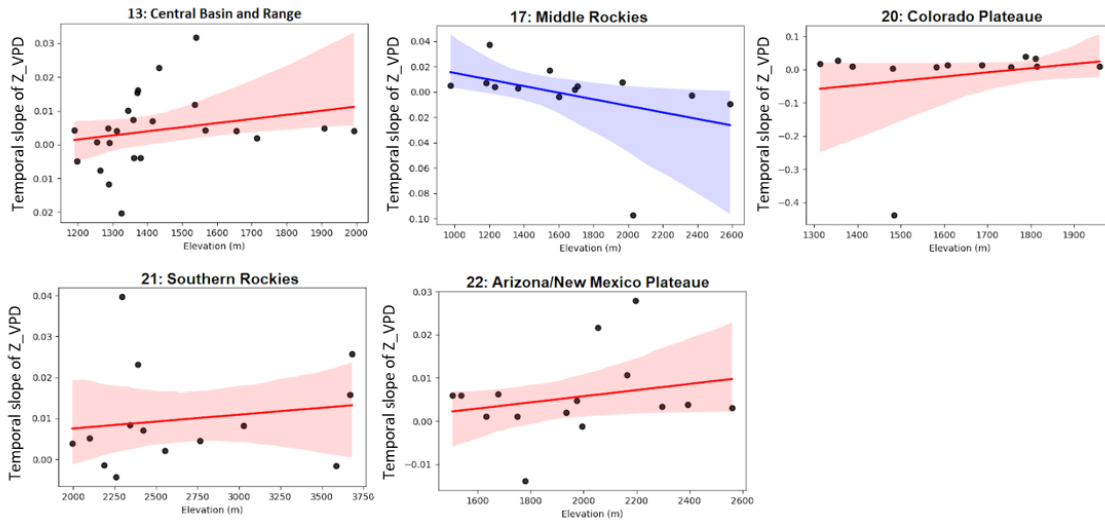

**Figure S53. Elevational dependent fire danger intensification using ground observation data.** Trend line shows elevational gradient of temporal trends in z-score of average warm-season VPD (shown with a dot for each station). Positive values (red shades) indicate larger intensification of fire danger in higher elevations. We used vapor pressure deficit (VPD) as the fire danger metric, since VPD calculation only requires daily maximum and minimum temperature and relative humidity that are commonly observed in various weather stations – as the broader suite of observations needed to calculate ERC are resulting in a limited sample of stations. Since the response of VPD to temperature increase is exponential which inflates trends in lower elevation stations that have higher temperature baselines compared to the higher elevation stations, we used linear regression of temporal trends in the z-score of VPD in each station  $\left( z = \frac{x - \text{mean}(x)}{\text{std}(x)} \right)$ . Among available stations within the boundaries of mountainous ecoregions of the western US, we selected stations with at least ten years of continuous and consistent daily data (daily max and min temperature and relative humidity). We calculated daily VPD, and then averaged them over May through September to calculate average warm-season VPD. We then calculated z-score VPD for warm season averages. We subsequently calculated the linear regression trend slope of z-score VPD as a function of elevation for ecoregions that have at least 10 stations. Obviously, neither 10 years of data is sufficient for temporal trend calculation nor 10 stations across the elevation gradient is enough for robust elevational trend analysis, but given the scarcity of consistent data providing stations, we proceeded with this selection.



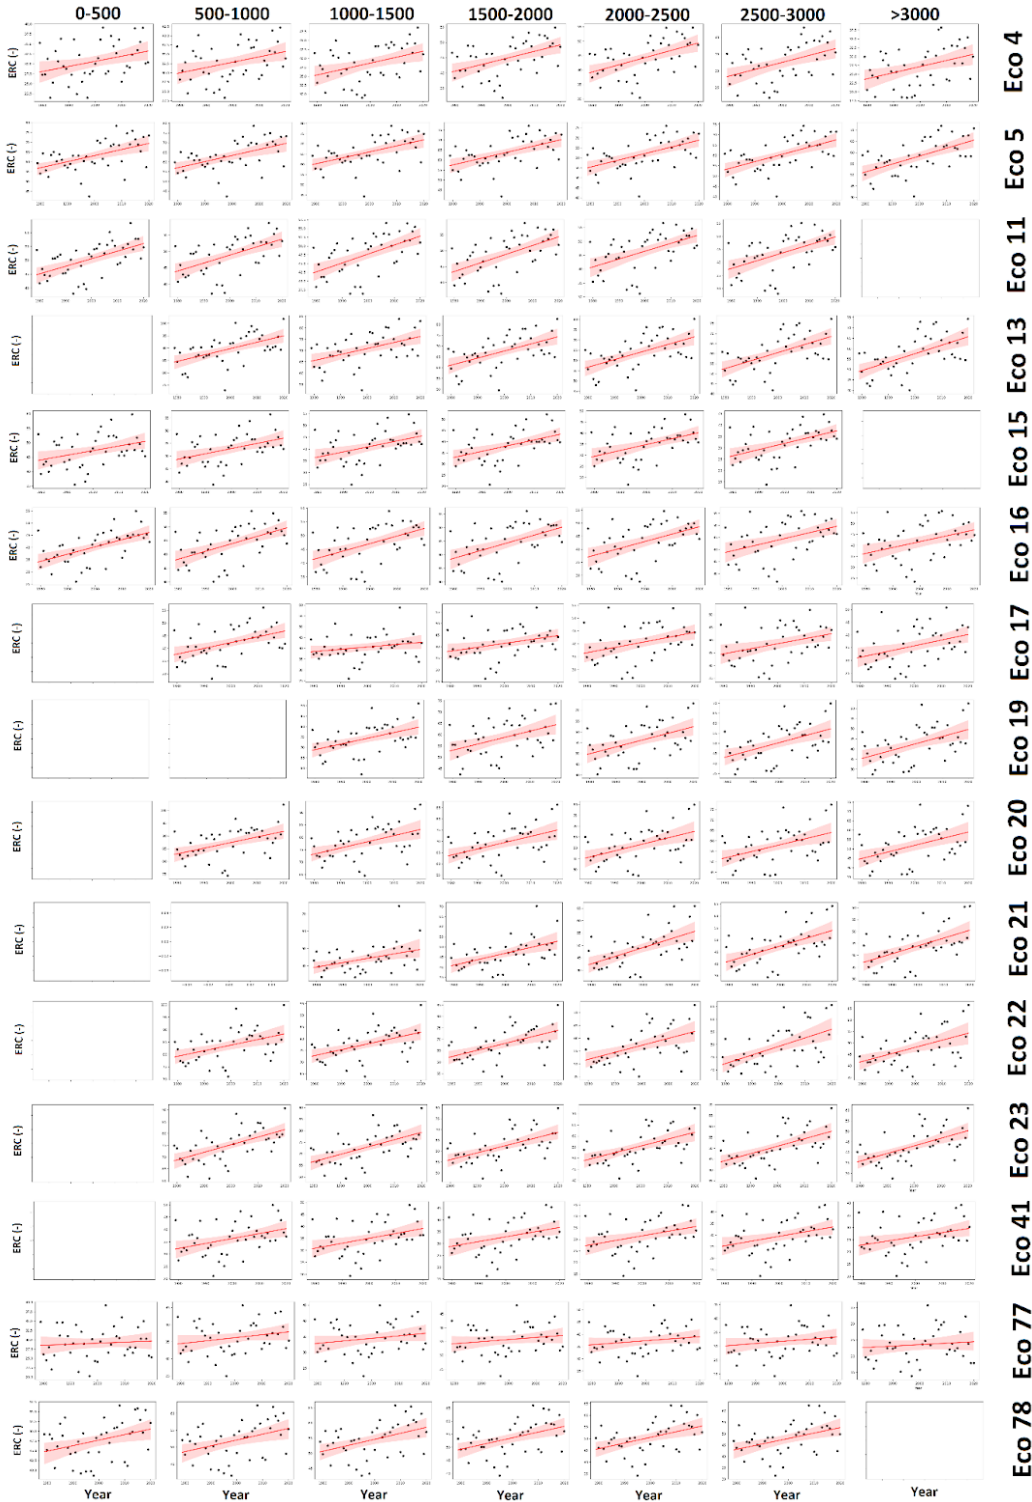

**Figure S54. Annual warm-season ERC from 1979-2020 (blue dots), and temporal trends (shaded red line), in each elevation band in each ecoregion. Elevation bands (with 500 m increments) are presented as columns and each ecoregion is presented in one row. For ecoregion names refer to [Table S1](#).**
